# A tonically active master neuron continuously modulates mutually exclusive motor states at two-time scales

Jun Meng<sup>1,2</sup>, Tosif Ahamed<sup>2\*</sup>, Bin Yu<sup>3</sup>, Wesley Hung<sup>2</sup>, Sonia El Mouridi<sup>4,5</sup>, Zezhen Wang<sup>6</sup>, Yongning Zhang<sup>3</sup>, Quan Wen<sup>6</sup>, Thomas Boulin<sup>4</sup>, Shangbang Gao<sup>3\*</sup>, Mei Zhen<sup>1,2\*</sup>

1. Department of Physiology, University of Toronto, Toronto, ON, Canada

2. Lunenfeld-Tanenbaum Research Institute, Mount Sinai Hospital, Toronto, ON, Canada

3. Huazhong University of Science and Technology, Wuhan, China

4. Univ Lyon, Université Claude Bernard Lyon 1, MeLiS, CNRS UMR 5284, INSERM U1314, Institut NeuroMyoGène, Lyon 69008, France

5. Current address: King Abdullah University of Science and Technology (KAUST), Biological and Environmental Science and Engineering Division (BESE), KAUST Environmental Epigenetics Program (KEEP), Thuwal, 23955-6900, Saudi Arabia

6. Division of Life Sciences and Medicine, University of Science and Technology of China, Hefei, Anhui, China

\* Correspondence

## Highlights

- Two mutually exclusive, forward and backward motor states, are inherently asymmetric
- The forward and backward motor states are not separately controlled
- A master neuron underlies continuous modulation and transitions of two motor states
- A tonically active premotor interneuron of the reversal circuit is the master neuron

## Abstract

Behaviors consist of distinct states and state transitions. How a neural system continuously modulates each state, which underlies smooth state transitions, is not well understood. *C. elegans* spontaneously switches between two mutually exclusive motor states, forward and backward movements, a behavior long thought to reflect the reciprocal antagonism between interneurons that separately gate the forward and backward motor circuits. We report here that during spontaneous locomotion, the two motor states are not separately controlled, and these interneurons are neither functionally equivalent nor strictly reciprocally inhibitory. AVA, the premotor interneuron previously thought to exclusively gate the backward motor circuit, regulates both motor states with opposite polarities at two-time scales. AVA's transient, fast activation inhibits the forward circuit while initiating the backward movement; in parallel, AVA maintains a slow, but constitutive excitation of the forward circuit to transit from reversals into maintained forward movement. This excitation results from AVA's sustained depolarized membrane potential, which makes its chemical synapse tonically active. A tonically active master neuron breaks the symmetry between the forward and backward motor circuits. It offers an elegant circuit solution for smooth transitions when animals switch between two mutually exclusive motor states.

## Introduction

Behaviors are often considered as sequences of discrete motor states. Some states, such as the forward and backward movements, are mutually exclusive<sup>1–11</sup>. Circuit structures such as the winner-take-all and reciprocal inhibition represent a few general solutions that select and promote distinct states<sup>12–16</sup>.

However, at shorter timescales, behaviors are less discrete and are more accurately represented as continuously modulated variables, such as the velocity for locomotion<sup>3,17–20</sup>. This is particularly evident when animals switch between mutually exclusive motor states. Indeed, growing experimental evidence shows that the neural network's activity is continuously modulated in behaving animals<sup>21</sup>. Circuit solutions for continuous modulation that underlies smooth transitions between mutually exclusive states are not well understood.

We address this question using the *C. elegans* model system. *C. elegans* exhibits two mutually exclusive motor states: forward movement and backward movement, propelled by the posteriorly and anteriorly propagating undulatory bending waves, respectively. In the absence of explicit sensory stimuli, animals spontaneously switch between the two states<sup>22</sup>.

The transition between forward and backward movements has been described by a reciprocally inhibitory neural model: two modules, one for forward movement and one for backward movement<sup>23,24</sup>, function separately<sup>25–29</sup>; synaptic connectivity regulates the transition rate and dwell time in each module<sup>6</sup>. This model treats the forward and backward states as mirrored modules; transitions from one to another occur stochastically or through an external input bias.

Previous measurements of *C. elegans* locomotion have revealed additional features not captured by this model. Examples include the continuous decay of forward speed prior to the transition into backward movement<sup>6,18,22,30</sup>, the period of post-stimulus arousal, during which animals exhibit a higher than pre-stimulus velocity after they exit escape responses<sup>31</sup>, and the observation that reducing the activity of premotor interneurons of the backward module decreases not only the backward but also forward speed<sup>32</sup>.

Here we revisit the relationship between the forward and backward motor circuit during spontaneous locomotion. Anatomically, two groups of non-spiking premotor interneurons, AVB and AVA, make dominant inputs onto two groups of motor neurons that separately execute the forward and backward movements<sup>23,24</sup>. Their functions have been considered to be ‘dedicated’, with AVB gating the forward motor circuit and AVA gating the backward motor circuit<sup>25–29</sup>.

However, we found that AVA and AVB are not functionally equivalent and are not strictly reciprocally inhibitory. Instead, AVA, the premotor interneuron that gates the backward motor circuit, has a constitutive and excitatory input on AVB, which activates forward movement. This allows AVA to not only inhibit the forward circuit when it activates the backward movement, but also activate the forward circuit to promote exit from reversals into sustained forward movement. Hence AVA functions as a master neuron to sustain locomotion.

These results allude to an inherent asymmetry in a motor circuit that operates with mutually exclusive motor states. We draw this conclusion from evidence revealed by following experimental and modeling studies.

First, our whole-cell patch clamp recording revealed that AVA maintains a strongly depolarized membrane potential, whereas AVB does not. A non-spiking neuron’s activity is sensitive to changes to its membrane potential. Manipulation of its endogenous K<sup>+</sup> leak leads to controlled perturbation of its activity. When we introduced a further depolarization of AVA by decreasing its K<sup>+</sup> leak, both forward and backward movements are potentiated. With moderate hyperpolarization, both motor states are potently inhibited. These effects are not mirrored by AVB manipulation.

These findings prompted us to next evaluate the relationships between AVA and AVB when animals spontaneously locomotion. We found that the calcium and behavior imaging data from wild-type animals fit a simple mathematical model: a fast and inhibitory input and a slow excitatory input from AVA to AVB can predict both AVB activity and animal velocity. This model fits the calcium and behavioral imaging data when AVA becomes further depolarized, but fails when AVA is moderately hyperpolarized. These results postulate that AVA might inhibit or potentiate AVB at different phases of locomotion, an effect that requires AVA to maintain a depolarized membrane potential.

These results are consistent with the previous observation that chemogenetic inactivation of AVA reduces overall velocity<sup>32</sup>, but not consistent with the previous observation that optogenetic activation of AVA locks the animal in the backward motor state<sup>33–36</sup>. With an

optogenetic stimulation protocol that mimics constitutive depolarization, we confirmed that increased AVA activity potentiates overall velocity. With the behavioral effect of titrated chemogenetic inhibition that mimics a sequential hyperpolarization of AVA, we obtained further support on AVA's opposing effect on the forward motor circuit: while AVA's transient depolarization, which initiates backward movements, inhibits forward movement, in parallel, AVA maintains a positive input on the forward circuit to promote forward movement.

Finally, through cell and synapse ablation, we showed that AVA potentiates the forward circuit through constitutive acetylcholine release. Thus, by maintaining depolarized membrane potential, AVA maintains an excitatory input onto the forward circuit while gating the backward motor circuit.

These results lead to an alternative model. Instead of operating as two equivalent and opposing modules, a tonically active master neuron breaks the symmetry by regulating both forward and backward motor states. A master neuron provides a circuit solution for continuous modulation of velocity during spontaneous transitions between mutually exclusive states.

Intriguingly, this master neuron has long been thought to play a singular role in the backward motor circuit. With an inherently higher activity, the reversal module is more frequently evoked during the escape, a behavior essential for survival. Under ambient laboratory conditions, *C. elegans* favors forward over backward movement by actively suppressing the reversal module by gap junction-mediated shunting. It makes economic sense for a neural system to make use of the tonic activity of a neuron, primed to execute escapes, to support forward locomotion.

## Results

### AVA maintains a more depolarized membrane potential than AVB

AVA and AVB do not fire all-or-none action potentials. Instead, their membrane potentials fluctuate in an analog fashion<sup>6,37,38</sup>. Instead of choosing the lowest value at an arbitrarily estimated steady state as the 'resting' potential, we represent their membrane potentials by the range, as well as the dynamics. The range is shown by cumulative distribution (Fig. 1S1A), and the dynamics by the joint probability distribution of the membrane voltage and its time derivative (Fig. 1S1B).

Quantification of our AVA whole-cell patch clamp recording supports the previous conclusion<sup>39–41</sup> that AVA maintains a depolarized potential at multiple stable states. AVA's potential ranged from approximately -30 mV to -10 mV (median -23 mV) (Fig. 1F; Fig. 1SA). Its fluctuation exhibits two regimes with small time derivatives, one from -30 mV to -20 mV, and the other from -15 mV to -10 mV (Fig. 1S1C).

In contrast, our recording of AVB revealed a membrane potential at a more hyperpolarized range, approximately from -75mV to -10mV (median -57mV) (Fig. 1S1A). AVB also exhibited dynamic changes in different stable states, most prominently from -75 mV to -45 mV (Fig.

1S1B).

AVA's membrane properties are consistent with the notion that AVA could remain active even when it is at baseline. At baseline, AVA's potential is near the opening threshold of UNC-2<sup>42</sup>, a synaptic high voltage-gated calcium channel that promotes vesicular release<sup>43–45</sup>.

### **An endogenous K<sup>+</sup> leak current regulates AVA's membrane potential**

To understand why AVA is tonically depolarized, we examined the consequence of changing its membrane potential.

A neuron's membrane potential can be manipulated by changing its inward and outward leak currents (Fig. 1A). We identified TWK-40, a two-pore domain potassium (K2P) channel, for potential conductance of K<sup>+</sup> leak in AVA (Methods; Fig. 1B). Endogenously tagged (Fig. 2S1A) and fully functional (Fig. 2S1B) TWK-40::TagRFP was more abundantly expressed in three neuron classes, AVA, AVB, and DVA, with AVA expression level higher than others (Fig. 1C). TWK-40::TagRFP is present at the plasma membrane of the soma and enriched along the neurite (Fig. 1C).

TWK-40 forms a functional K<sup>+</sup> leak channel (Fig. 1D). Heterologous expression of TWK-40 in the HEK293T cells led to a small increase of their outward leak current (Fig. 1D), similar to a few mammalian K2P channels<sup>46–48</sup>. A gain-of-function (gf) form, which carries a mutation (L181N) that universally increases K2P channel activity<sup>49,50</sup>, led to a large increase in the outward leak current that depends on the intracellular K<sup>+</sup> (Fig. 1D).

We introduced loss-of-function (lf) and gain-of-function (gf) mutations in *C. elegans twk-40* genomic locus (Fig. 1B; Methods). As expected, AVA exhibited a decreased and increased outward leak current in *twk-40(lf)* and *twk-40(gf)* animals, respectively (Fig. 1E). Consistent with the effect of K<sup>+</sup> leak, AVA's membrane potential became further depolarized in *twk-40(lf)* (~-25mV to 0mV), and hyperpolarized in *twk-40(gf)* animals (-40mV to -10mV) (Fig. 1F; Fig. 1S1C). AVA-specific restoration of TWK-40 led to increased outward leak current (Fig. 1E) and hyperpolarization (Fig. 1F; Fig. 1S1C).

### **Genetic manipulation of leak channel activity perturbs AVA's calcium activity**

Genetic manipulation of the membrane potential allows for controlled activity perturbation of non-spiking neurons. Indeed, in freely-moving *twk-40(lf)* and *twk-40(gf)* mutants, AVA exhibited increased and decreased overall calcium signals, respectively (Fig. 1S2A). Moreover, consistent with the opposing effects of the inward Na<sup>+</sup> leak and outward K<sup>+</sup> leak currents on membrane potential, genetic mutations that lead to an increased Na<sup>+</sup> leak (*nca-1(gf)*) partially restored the diminished AVA calcium signal in *twk-40(gf)* mutants (Fig. 1S2B).

With cell-type specific manipulation of TWK-40 activity, below we investigate the physiological consequence of AVA's depolarized membrane potential, in the context of the intact motor circuit and spontaneous locomotion.

## Depolarization of AVA potentiates both backward and forward movements

In the absence of explicit sensory stimuli, wild-type animals spontaneously switch between forward and backward movements (Fig. 2A). *twk-40(lf)* mutants exhibit more frequent transitions into the backward motor state, prolonged reversals, and increased body bending during both reversals and forward movement (Fig. 2B, C). These changes suggest an increase in the animal's overall motor activity.

To assess which neurons contribute to the increased motor activity, we degraded endogenous TWK-40 proteins from sub-groups of TWK-40-expressing neurons using a repurposed ubiquitin-ligase system<sup>51</sup> (Methods; Fig. 2S1A, B). Depleting TWK-40 from AVA alone was sufficient to recapitulate overall increased motor activity (Fig. 2B, C; Fig. 2S1E), while depletion of TWK-40 from AVB, DVA, or additional neurons with minimal expression of TWK-40 (Methods; Fig. 2S1D) had no effect (Fig. 2S1E). When we restored TWK-40 specifically to AVA in *twk-40(lf)* animals, body bending during both forward and backward movements was restored to wild-type levels (Fig. 2S1C). Consistently, AVA exhibited increased calcium activity with AVA-specific depletion of TWK-40 (AVA-TWK-40(lf)), as in *twk-40(lf)* mutants (Fig. 2S2C).

These results were unexpected. Considered as 'dedicated' to the backward motor circuit, AVA should either explicitly regulate the backward circuit, or exert opposite effects on the backward and forward circuits. To further evaluate its role in forward movement, we abolished the animal's ability to reverse by ablating the motor neurons that execute reversals, the A-MNs (Methods). Forward movement was not significantly changed in these animals<sup>25</sup>. However, further ablation of AVA led to significant attenuation of forward movement (Fig. 2S2A). In *twk-40(lf)* mutants, co-ablation of AVA and A-MNs similarly reduced their forward movement (Fig. 2S2A). Thus, further depolarization of AVA potentiates backward as well as forward motor circuit activity.

## Hyperpolarization of AVA decreases both backward and forward movement

Mirroring our observation with the *twk-40(lf)* mutants, the *twk-40(gf)* mutation exerts a similar effect for both forward and backward motor states. *twk-40(gf)* mutants exhibit reduced motor activity, with a slightly stronger effect on reversals: forward movement was drastically reduced, and backward movement was abolished (Fig. 2B, C). Furthermore, with AVA-specific TWK-40(gf) expression, AVA's calcium activity was drastically reduced (Fig. 2S2C), and overall motor activity was reduced, with a slightly stronger effect during backward movement (Fig. 2B, C).

These defects could not be explained by a potential developmental effect of hyperpolarization. Indeed, applying an acute, optogenetic silencing of AVA with GtACR2 (Methods), we also observed similarly silenced forward and backward movement (Fig. 2S2B).

Together, AVA's depolarized membrane potential sustains the animal's motility, not only during backward but also forward movements.



## **AVA's potentiation of forward movement requires AVB**

To investigate the circuit mechanism that underlies AVA's potentiation of forward movement, we examined the effect of ablating neurons that have been implicated in either potentiating forward locomotion<sup>27,52</sup> (AVB, PVC) or partitioning the forward and backward motor states<sup>53–58</sup> (RIM) (Fig. 3S1A).

Consistent with previous reports<sup>27,36,59</sup>, ablation of AVB significantly reduced forward movement (Fig. 3A). More importantly, ablating AVB in AVA-specific TWK-40(lf) mutants significantly reduced forward movement (Fig. 3B). AVB ablation did not further attenuate the forward movement in AVA-specific TWK-40(gf) mutants, or upon optogenetic hyperpolarization of AVA (Fig. 3S1B, C).

Ablation of other neurons - PVC and RIM - did not attenuate the forward movement of either wild-type animals (Movie S1) or *twk-40(lf)* mutants during spontaneous locomotion (Fig. 3S1A; Movie S2).

## **AVA positively regulates AVB's activity**

To examine how AVA regulates AVB's activity, we directly assessed the amplitude of dynamic change of AVB's membrane potential upon perturbation of AVA (Fig. 3C; Fig. 3S2A).

In wild-type animals, AVB's membrane potential fluctuates between -75mV and -10mV (median -55mV) (Fig. 3S2B, wild-type). When AVA was further depolarized, AVB exhibited a significant increase in the amplitude of potential changes (Fig. 3C; Fig. 3S2A, AVA-TWK-40(lf)), which might correlate with a more depolarized membrane potential range (~-50mV to -10mV, median -32mV) (Fig. 3S2B, AVA-TWK-40(lf)). Conversely, when AVA was hyperpolarized, the dynamic range of AVB's membrane potential changes was drastically reduced (Fig. 3C; Fig. 3S2A, AVA-specific TWK-40(gf)), and AVB exhibited a slight hyperpolarization in the membrane potential range (~-75mV to -30mV, median -58mV) (Fig. 3S2B, AVA-specific TWK-40(gf)).

Consistently, in freely moving animals, AVB's mean calcium activity showed a corresponding increase and decrease when AVA was further depolarized (Fig. 3D, AVA-specific TWK-40(lf)) and hyperpolarized (Fig. 3D, AVA-specific TWK-40(gf)), respectively.

Together, AVA's depolarized membrane potential positively regulates AVB, the premotor interneuron that potentiates forward movement.

## **Communication from AVA has a more dominant effect on AVB**

These results revealed an unexpected, non-antagonizing input from AVA to AVB. We asked whether this effect was reciprocal, specifically, whether AVB might also potentiate AVA.

We examined the effect of AVB inhibition on the backward motor circuit. As expected, optogenetic silencing of AVB reduced the forward movement in moving animals (Fig. 4A; Fig. 4SA) and decreased AVB's calcium activity in immobilized animals (Fig. 4SC). In these animals,

the backward movement was unchanged (Fig. 4A; Fig. 4SA), and AVA's activity pattern was similar with or without AVB silencing (Fig. 4C).

The lack of an effect of AVB silencing on AVA contrasted with the effect of AVA silencing on AVB. Consistent with the notion that AVA positively regulates AVB's membrane potential and calcium activity, optogenetic inhibition of AVA led to attenuated forward movement in moving animals (Fig. 2S2B; Fig. 4B), and reduced calcium activity in both AVA and AVB (Fig. 4D; Fig. 4S1D).

These results reveal a more complex relationship between AVA and AVB. Instead of a strict reciprocal inhibition, these experimental findings implicate an asymmetry between the forward and backward motor circuits. During spontaneous locomotion, communication is predominantly from AVA to AVB.

### **A two-timescale model predicts AVA's regulation of AVB activity**

These results raised the need to directly examine the relationship between AVA and AVB neuronal activity, which had not been simultaneously analyzed in freely moving animals<sup>6,26,60</sup>. We performed simultaneous calcium imaging of AVA and AVB during spontaneous locomotion and examined their relationship (Methods).

For both neurons, the largest activity transients occurred during motor state transitions. As reported<sup>26,27,60–65</sup>, each epoch of AVA transients aligned with a transition event. Specifically, the initiation of a reversal coincided with the onset of AVA's calcium rise, whereas the exit from a reversal coincided with the onset of AVA's calcium decay (Fig. 5SA). During this period, AVB's calcium change was anti-correlated with that of AVA (Fig. 5B; Fig. 5SB).

This relationship changed after animals began an exit from the reversal. While AVA's activity rapidly decayed to a steady baseline, AVB showed a continued rise as the animal exited the reversal, followed by a slow decay after the animal entered forward movement (Fig. 5B; Fig. 5SA). AVA maintained its baseline calcium signals during subsequent forward movement (Fig. 5B; Fig. 5SA).

We sought the simplest mathematical model that describes this dynamical relationship. Because the functional communication between the two neurons was largely unidirectional (Fig. 4), we considered an input/output model where AVA is treated as the input to AVB. The calcium imaging data suggested a model with two timescales: a fast input during reversals, and a slower one during post-reversals, to account for two phases of AVB activity dynamics. This led to a simple linear dynamical system model (Fig. 5A, upper panel).

$$x_{AVB} = a \cdot x_{AVA} + b \cdot y \quad (1)$$

$$\frac{dy}{dt} = -\frac{1}{\tau} \cdot y + x_{AVA} \quad (2)$$

where  $x_{AVB}$  and  $x_{AVA}$  represent the activity of AVB and AVA, respectively;  $y$  represents the slow input from AVA (1), given by the leaky-integrator in (2). The model has three free parameters:



the strength of the fast input,  $a$ , the strength of the slow input,  $b$ , and the timescale for the slow input,  $\tau$ .

We used the framework of linear systems identification to fit parameters to our calcium imaging data (Fig. 5B; Methods). The best-fit parameters set the strength of fast input  $a$  to a negative value and the slow input  $b$  to a positive value (Fig. 5D).

Biologically, this could be interpreted as the forward circuit receiving input from AVA at two timescales with opposite polarities: a fast inhibitory input and a slow excitatory input. In other words, AVA maintains a constitutive and excitatory input on AVB, in addition to a strong activation-mediated inhibitory input to AVB during transitions. Without the slow excitatory input, the gradual decay of AVB activity after a reversal cannot be predicted by the one timescale model (Fig. 5B, C).

With different parameter values, this two-timescale model could also predict the animal's spontaneous velocity from AVA's activity (Fig. 5E), thus capturing the continuous modulation of behavior during state transitions.

Together, these results suggest a new model where AVA functions as a master regulator of spontaneous locomotion by bi-directional regulation of AVB at different timescales. A transient but strong depolarization of AVA leads to phasic inhibition during reversals, while a persistent but weak depolarization of AVA provides tonic excitation to AVB that promotes forward movement between reversals (Fig. 5A, lower panel).

### **Depolarized membrane potential is necessary for AVA's master regulator role**

We asked if AVA's master regulator role requires AVA to maintain its membrane potential. We co-imaged AVA and AVB in freely behaving AVA-specific TWK-40(lf) and AVA-specific TWK-40(gf) mutants, and examined their relationships.

When we further depolarized AVA (AVA-TWK-40(lf)), the time-dependent relationships with AVB and velocity are maintained (Fig. 5SB; 5SD). The two-timescale model predicted AVB's activity (Fig. 5B-D) and velocity (Fig. 5Gii) from AVA's calcium signals. Parameters for both inputs showed a trend of further increase, but with a slightly higher value for the fast input  $a$  (Fig. 5D). Biologically, this suggests that with further depolarization, AVA maintains and strengthens both fast-inhibitory and slow-excitatory inputs (Fig. 5D; Fig. 5SD).

In AVA-TWK-40(gf) mutants, the relationship between AVA and AVB activity changed completely such that the model was no longer applicable. Both neurons exhibited drastically reduced calcium signals with little dynamical changes (Fig. 2B, C; Fig. 5SA). In rare cases where AVA exhibited detectable calcium transients, AVB tracked these changes (Fig. 5F), but these transients were not correlated with specific motor states (Fig. 5SC).

These results suggest that the two-time scale model for AVA's master regulator role is contingent on its depolarized membrane potential.

### **A constitutive, minimal optogenetic depolarization of AVA potentiates the forward circuit**

Our results reveal AVA's dual modulation – transient inhibition and constitutive excitation – of the forward circuit. Previous optogenetic depolarization of AVA resulted in instantaneous initiation and sustenance of reversals<sup>35,36</sup>. We reasoned that current stimulation protocols only reflect AVA's inhibitory effect on the forward circuit upon strong depolarization (Fig. 6A).

To mimic constitutive, weak excitation, we applied a new stimulation protocol to a strain that expresses Chrimson specifically in AVA (Fig. 6B; Methods). Specifically, we pre-conditioned the AVA neuron through a period of activation before we subjected animals to constitutive and minimal light stimulation. These animals recapitulated the motor pattern of AVA-TWK-40(lf) mutants – more frequent transitions and potentiation of both forward and backward movements (Fig. 6B, '+ Con, +ATR'). Without pre-conditioning (Fig. 6B, '- Con, +ATR'), this stimulation increased reversal frequency without potentiating forward movement. Without the co-factor that activates Chrimson (Fig. 6B, '+ Con, -ATR'), light alone did not potentiate either motor state. Consistent with the requirement of AVB for the behavioral effect of AVA's stimulation, in the absence of AVB, this stimulation protocol no longer potentiated the forward movement (Fig. 6S, '-AVB').

This result corroborates our conclusion that AVA maintains a weak, but constitutive excitatory input onto the forward motor circuit.

### **Titration of chemogenetic hyperpolarization isolates AVA's potentiation of the forward circuit**

A constitutive input from AVA may reflect a tonic activation of its synaptic activity. We examined this possibility through dosage-dependent chemogenetic hyperpolarization by a histamine-gated chloride channel (HisCl)<sup>31</sup>.

Exposing animals that ectopically express HisCl in AVA led to a histamine-dependent reduction of reversals, as well as spontaneous forward speed<sup>31</sup>. We further noted that the backward motor circuit exhibited higher sensitivity to histamine (Fig. 6C, D). At 2mM, histamine nearly fully blocked reversals (Fig. 6C) but only modestly reduced forward movement (Fig. 6D). With increased histamine, forward movement progressively declined (Fig. 6D).

An implication of this result is that with sequential membrane hyperpolarization, AVA rapidly loses its ability of transient activation that underlies inhibitory input onto the forward circuit, but gradually loses its constitutive activation that underlies excitatory input on the forward circuit.

To directly visualize the effect of HisCl on AVA's synaptic activity, we examined the intensity of synaptobrevin/SNB-1::pHluorin, a marker of synaptic vesicle exocytosis<sup>63</sup> along the AVA axon (Fig. 6F; Methods). As expected from increased and decreased vesicular release, *twk-40(lf)* and

*twk-40(gf)* mutants exhibited an increased and decreased steady-state fluorescent intensity, respectively (Fig. 6F). In wild-type animals, histamine-induced AVA hyperpolarization led to a dosage-dependent progressive decrease of SNB-1::pHluorin signals (Fig. 6E). These results are consistent with a gradual attenuation of synaptic vesicle release as AVA becomes increasingly hyperpolarized. Importantly, at lower histamine concentrations, which blocked reversals with modest effects on forward movement, SNB-1::pHluorin signals were reduced but remained.

Together, our genetic, optogenetic, and chemogenetic perturbation of AVA's membrane potential consistently demonstrates AVA's dual modulation of the forward motor circuit: in parallel to a transient inhibition during reversals, AVA maintains constitutive excitation likely through constitutive synaptic activity.

### **Tetanus toxin selectively blocks AVA's chemical synaptic transmission**

We asked whether AVA's transient and constitutive inputs are mediated through different forms of synaptic transmission. AVA forms both chemical and electrical synapses with other neurons<sup>23,26,66,67</sup>. For chemical synaptic transmission, AVA functions primarily as a cholinergic neuron but also synthesizes multiple neuropeptides<sup>68–70</sup>.

Tetanus toxin (TeTx) cleaves synaptobrevin/SNB-1 and is commonly used to block chemical synaptic transmission<sup>71,72</sup>. Prior to applying TeTx to block AVA's chemical synaptic transmission, we first asked whether TeTx impairs exocytosis of both synaptic and dense core vesicles, which underlie classic neurotransmitter release and neuromodulator secretion, respectively.

We addressed this question by comparing TeTx's effect on a synaptic vesicle marker (SNB-1::GFP) (Fig. 7A) and two neuropeptide markers<sup>73</sup>, INS-22::pHluorin (Fig. 7B) and INS-22::GFP (Fig. 7C, D), all expressed in AVA. TeTx, specifically expressed by AVA, diminished the SNB-1::GFP signals at AVA's presynaptic termini (Fig. 7A). In contrast, TeTx did not change the steady-state signals of INS-22::pHluorin, a proxy for dense-core vesicle exocytosis (Fig. 7B). INS-22::GFP signals were increased along AVA's axon (Fig. 7C), but were similarly accumulated in the scavenger cell for secreted peptides (Fig. 7D).

These results indicate that at least in the AVA neuron, TeTx potently blocks synaptic vesicle release, but has only a minor effect on neuropeptide secretion. This allowed us to attribute the effects of specific expression of TeTx in AVA (below) to impaired chemical synaptic transmission.

### **Cholinergic transmission underlies AVA's constitutive excitation of the forward circuit**

AVA-specific expression of TeTx (AVA-TeTx) led to significant decreases in forward and backward movements, in both wild-type animals and *twk-40(lf)* mutants (Fig. 8S). Because AVA is a cholinergic neuron, we further compared the effect of reducing vesicle loading of acetylcholine by AVA-specific RNA interference (RNAi)<sup>74</sup> against the acetyltransferase CHA-1 (Methods<sup>75</sup>). Similar to AVA-TeTx, AVA-specific *cha-1* RNAi led to a reduction of both forward movement (Fig. 8A) and backward movement (Fig. 8SA). Lastly, TeTx fully blocked AVA-

mediated potentiation of forward movement upon constitutive and minimal optogenetic stimulation (Fig. 8B). These results demonstrate that AVA's potentiation of the forward motor circuit requires cholinergic synaptic transmission.

Consistent with its behavioral effect, TeTx disrupted AVA's dynamic relationships with AVB (Fig. 8C). In AVA-TeTx animals, AVA continued to exhibit calcium activity transients; however, AVB's activity transient was drastically reduced (Fig. 8SB), disrupting the correlation between AVA and AVB calcium dynamics (Fig. 8C). Occasionally, AVB exhibited activity transients that did not correlate with AVA. Neither AVA nor the rare AVB calcium dynamics showed correlations with velocity (Fig. 8SC).

We conclude that AVA's acetylcholine release contributes to both constitutive activation and transient inhibition of the forward motor circuit (Fig. 8D). Critical for this study is a requirement for AVA's tonic cholinergic transmission to potentiate forward movement. The simplest implication is that AVA's strongly depolarized membrane potential supports the constitutive vesicular release of acetylcholine, providing a slow but continuous positive driving force for the forward motor circuit to ensure smooth motor state transitions.

## Discussion

Our study investigates how a neural system continuously modulates different behavioral states to aid their transitions. *C. elegans* spontaneously switches between forward and backward movements. Despite being mutually exclusive, the two motor states are not independently controlled. Two groups of premotor interneurons separately gate the motor neurons that execute either forward or backward movements, but these interneurons do not strictly antagonize each other. Instead, AVA, the interneuron that gates motor neurons for reversals, regulates AVB, the interneuron that activates motor neurons for forward movement, at two timescales, and with opposite polarities. When AVA activates the reversal motor neurons, a fast but transient inhibitory input to AVB promotes the backward movement. Simultaneously, AVB receives a slow but tonic excitatory input from AVA, which allows transitions from reversals into sustained forward movement. Mechanistically, AVA's tonic excitatory input results from a depolarized membrane potential, which supports constitutive acetylcholine release. This configuration breaks the structural and functional symmetry between the forward and backward motor circuit, making AVA the master regulator of both states (Fig. 8D). A tonically active master neuron offers an elegant circuit solution for continuous behavioral modulation.

### Forward and backward motor states are asymmetric

*C. elegans* intrinsically switches between the forward and backward motor states, but these two states are not merely mirrored functional modules.

During spontaneous locomotion, *C. elegans* preferentially sustains forward movement over backward movement, resulting in a higher propensity of the forward state. But when executed, the shorter backward movement exhibits greater vigor than the forward movement<sup>76</sup>.

Reversal is more frequently evoked and prolonged when animals encounter repulsive stimuli and attempt to escape<sup>22,76,77</sup>. Importantly, evoked reversals potentially modify the forward motor state that follows. A prolonged reversal is more likely followed by a turn, a form of forward movement that steers away from the original trajectory, whereas a shorter reversal is more likely followed by forward movement with a similar trajectory, which resembles most spontaneous reversals<sup>76,78–82</sup>. Evoked reversals further increase the forward speed, potentiating the forward state for up to several minutes<sup>83</sup>.

Reversal thus represents an intrinsically more robust, but actively suppressed motor state; its activation modifies and potentiates the subsequent forward state. Our studies examine neural mechanisms that underlie this inherent asymmetry.

### **Forward and backward motor states are not separately controlled**

Anatomically, the forward and backward motor circuits consist of distinct sets of motor neurons and premotor interneurons, wired with mixed electrical and chemical synapses. Despite the similarity in their wiring configuration, the two motor circuits are not symmetric modules.

Neurons that drive backward movement have higher excitability. The premotor interneuron AVA maintains a depolarized membrane potential at ~ -23mV, contrasting with the significantly hyperpolarized potential of the premotor interneuron of the forward circuit (~-55mV). Excitatory motor neurons that execute reversals have higher spontaneous activity than those controlling forward movement<sup>25,27</sup>. These differences corroborate the intrinsic robustness of reversals.

Neurons of the backward motor circuit also play a more dominant role in overall motor control. While the two motor states are separately executed by motor neurons in each circuit<sup>25,29</sup>, they are not separately regulated by premotor interneurons. AVB is more dedicated to promoting the forward state. In contrast, AVA promotes both motor states. When depolarized, AVA initiates reversals. When at its 'rest' state, it generates a tonic, positive drive for AVB to promote forward movement.

AVA being a master regulator aligns with the modification of the forward motor state after evoked reversals. Reminiscent to the functional requirement of an excitation from AVA to AVB during spontaneous transitions, the 'turn' transition to forward movement requires excitation from the backward to the turning module<sup>82</sup>.

### **AVA underlies continuous modulation of motor activity**

A master neuron that bi-directionally regulates two mutually exclusive motor states aids spontaneous transitions.

Previously, we and others showed that AVA exerts dual modulation of the backward motor circuit<sup>25,26,57</sup>. At its 'rest' state, AVA reduces spontaneous reversals by gap junction-mediated shunting of the motor neurons that execute reversals. At its activated state, AVA initiates reversals via chemical synapse-mediated potentiation of these motor neurons. Here, we show that AVA's chemical synapses exert dual modulation of the forward circuit. At its 'rest' state, AVA steadily potentiates the forward motor circuit through a tonic release of acetylcholine. At its activated state, AVA transiently inhibits the forward circuit.

These are complementary effects for overall motor control. When AVA is at 'rest', the forward motor state is stabilized by simultaneous inhibition of the reversal circuit and activation of the forward circuit. Conversely, when AVA is activated, the backward motor state is promoted by simultaneous activation of the reversal circuit and inhibition of the forward circuit (Fig. 8D).

Central to AVA's role is its uniquely depolarized membrane potential (Table 1; this study) with a mixed wiring configuration. Being intrinsically depolarized, its gap junctions actively suppress the backward motor state, while its intrinsic excitability allows for phasic, but robust reversals. Being tonically depolarized, a baseline release from its chemical synapses slowly but tonically potentiates forward movement. With opposing effects on both motor circuits at different timescales, AVA underlies continuous modulation of both motor states.

Our model is derived from experimental data from spontaneous locomotion. The proposed configuration, with minimal feedback from AVB, likely represents a minimal functional module. When sensory inputs impose changes to locomotion, reciprocal feedback between AVA and AVB, and with other interneurons in the backward and forward modules, should be recruited to modify the relationship between forward and backward movement. However, the inherent asymmetry between the two motor states should always impose a more dominant effect from the reversal motor circuit.

#### **Premotor interneurons of the reversal circuit regulate overall motor activity**

It is intriguing that the premotor interneuron of the backward, but not the forward circuit, plays the dominant role in overall motor control. Reversals are driven by a robust but actively suppressed circuit. The motor system finds an economical solution by using the same tonic drive to shunt backward and potentiate forward locomotion. This solution allows animals to generate robust escape responses. Moreover, AVA's tonic input to AVB, an integrated copy of its activity with slow decay, might serve as a short-term memory of the history of internal states and environment.

#### **Partial convergence between anatomic and functional connectivity**

AVA's regulation of the forward circuit cannot be directly deduced from the anatomical wiring. In the wiring diagram, AVA does not make stereotypic direct synaptic inputs to AVB, whereas AVB makes stereotypic synaptic inputs to AVA<sup>23,84,85</sup>.



There are several potential explanations. The simplest is that AVA's synaptic connections with other interneurons relay its effects on AVB. The wiring diagram offers two candidates, RIM and PVC, that connect the forward and backward motor circuit. Indeed, our ablation of RIM or PVC led to an increased spontaneous reversal, an effect consistent with RIM-specific chemical synapse ablation<sup>52,55,57,78</sup>, but these animals maintain coordinated forward-backward transitions and spontaneous velocity. Their ablation did not reduce the overall motor activity in *twk-40(lf)* mutants either. A multi-synapse explanation cannot be excluded but seems unlikely.

Instead, we favor a mechanism in which AVA's tonic acetylcholine release facilitates extra-synaptic accumulation and potentiation of the forward motor circuit. Indeed, in the developing larvae, extrasynaptic cholinergic transmission from premotor interneurons provides the tonic potentiation of ventral muscles that functionally substitute for the missing ventral subcircuit<sup>86</sup>.

Importantly, systematic surveys of functional connectivity upon single neuron optogenetic stimulation revealed extensive discrepancies between the anatomic chemical synaptic wiring and functional connectivity throughout the *C. elegans* nervous system<sup>87,88</sup>. Partial correlations between anatomic wiring and activity patterns were similarly noted in other systems<sup>89–92</sup>.

Other forms of functional communication - ephaptic coupling, extrasynaptic transmission, modulatory signaling – might compensate for the limited number of anatomic wiring in a small neural system. However, the more interesting intuition is that the form of 'invisible' wiring might be preferentially utilized for spontaneous behavioral states, whereas anatomic wiring, such as AVB to AVA, is built mainly for contextual recruitment for evoked behaviors or decision-making. Essentially, it is another economical form of wiring by a small neural system.

### **Dynamic regulation of a non-spiking neural network**

With a few exceptions<sup>93,94</sup>, the *C. elegans* neural system consists primarily of non-spiking neurons<sup>37,40,41,95–99</sup>. This neural network generates behaviors that are stable, flexible, and adaptive, as neural networks that function through regenerative potentials.

AVA's functional model suggests that precise and dynamic regulation of the activity of non-spiking neurons and their network can be achieved through the precise modulation of membrane potentials. *C. elegans* exceptional expansion of K<sup>+</sup> channels, in particular, the 47 K<sup>+</sup> leak channels<sup>49,100–102</sup> might serve this role. When a neuron functions through graded potential changes, it is particularly suited for a K2P conductance to regulate its activity range and form of responses to stimuli<sup>100,103</sup>. With 47 K2P genes expressed by overlapping subgroups of 300 neurons<sup>69</sup>, these channels could define the unique computational properties of each neuron.

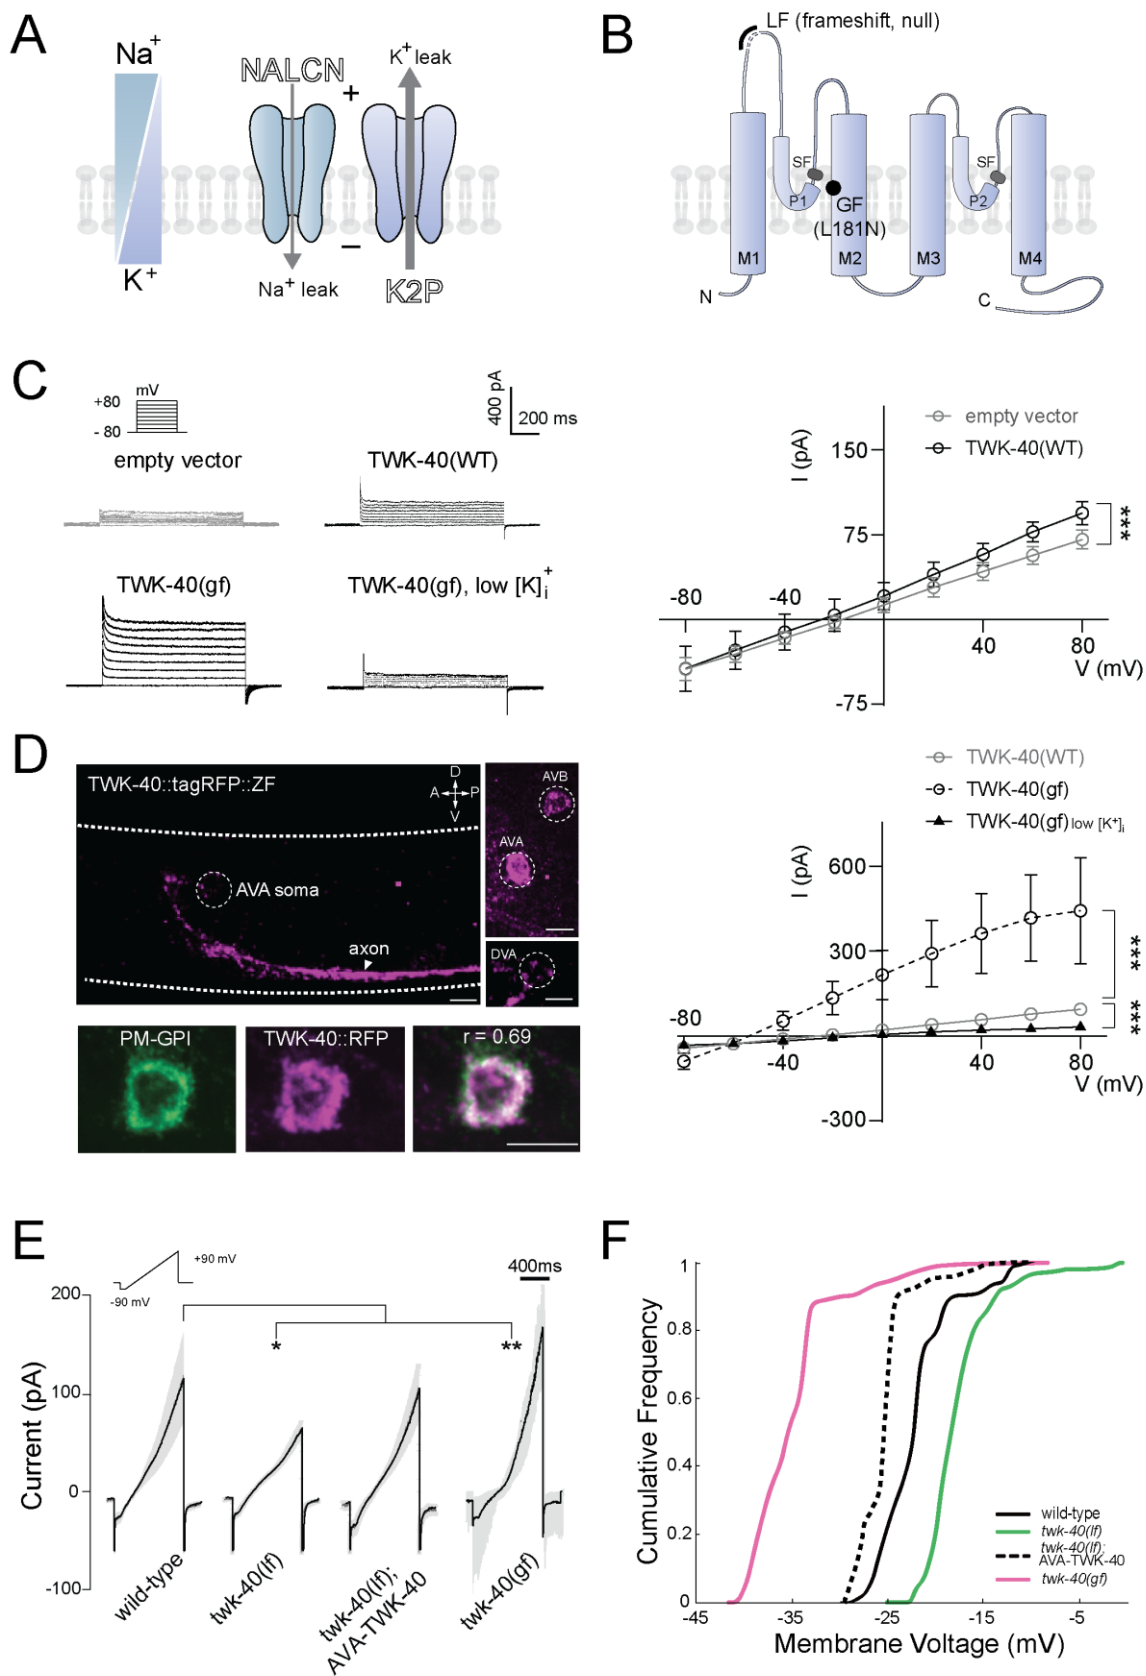

# **Figure 1. The K2P channel TWK-40 regulates AVA's membrane potential.**

- A. Schematics of the inward sodium and outward potassium leak currents and respective leak channels that contribute to a neuron's negative membrane potential.
- B. Schematics of the predicted topological structure of TWK-40 (isoform b) with denoted genetic mutations. LF: loss-of-function. A null allele (*hp834*) has a 7bp deletion that leads to truncation after the first transmembrane domain (M1). GF: Gain-of-function. *bln336* (L181N) has an activating mutation that promotes the conductance of all K2P channels.
- C. (Left) Representative step currents from HEK293 cells carrying different heterologous expression vectors by whole-cell voltage-clamp recording. (Right), I-V curve for respective cells with mean and 95% CI. Quantification showed average currents at +80 mV. Upper panel: Cells expressing wild-type TWK-40 (n=13) showed a small outward current compared to the cell with empty vector (n=12); Lower panel: Cells expressing TWK-40(GF) showed a larger current (n=10), which was diminished by reducing intracellular K<sup>+</sup> concentration from 140 mM to 14 mM (n=7). \* denotes statistical significance.
- D. Expression pattern of endogenously tagged TWK-40::tag RFP. (Upper panels), maximum intensity projection of confocal images of TWK-40::tagRFP. Dashed lines outline the animal. Somas are denoted by circles. The arrowhead labels processes along the ventral nerve cord. Scale bar, 2µm. (Lower panel) TWK-40::tagRFP co-localizes with a plasma membrane marker. r: Pearson's correlation.
- E. AVA's leak current was recorded by whole-cell patching, with a ramping potential from -60mV to +90mV. Black traces and gray areas denote mean and range. Currents at +80mV were compared. N = 5 (wild-type), 8 (*twk-40(lf)*) (n=8), 7 (*twk-40(lf); AVA-TWK-40*) and 7 (*twk-40(gf)*). \* denotes statistical significance.
- F. Cumulative fraction of AVA's membrane potential with no current injection in wild-type (n=7), *twk-40(lf)* (n=9), *twk-40(lf); AVA-TWK-40* (n= 9) and *twk-40(gf)* (n=13) animals. respectively, compared to wild-type (n=7) animals.

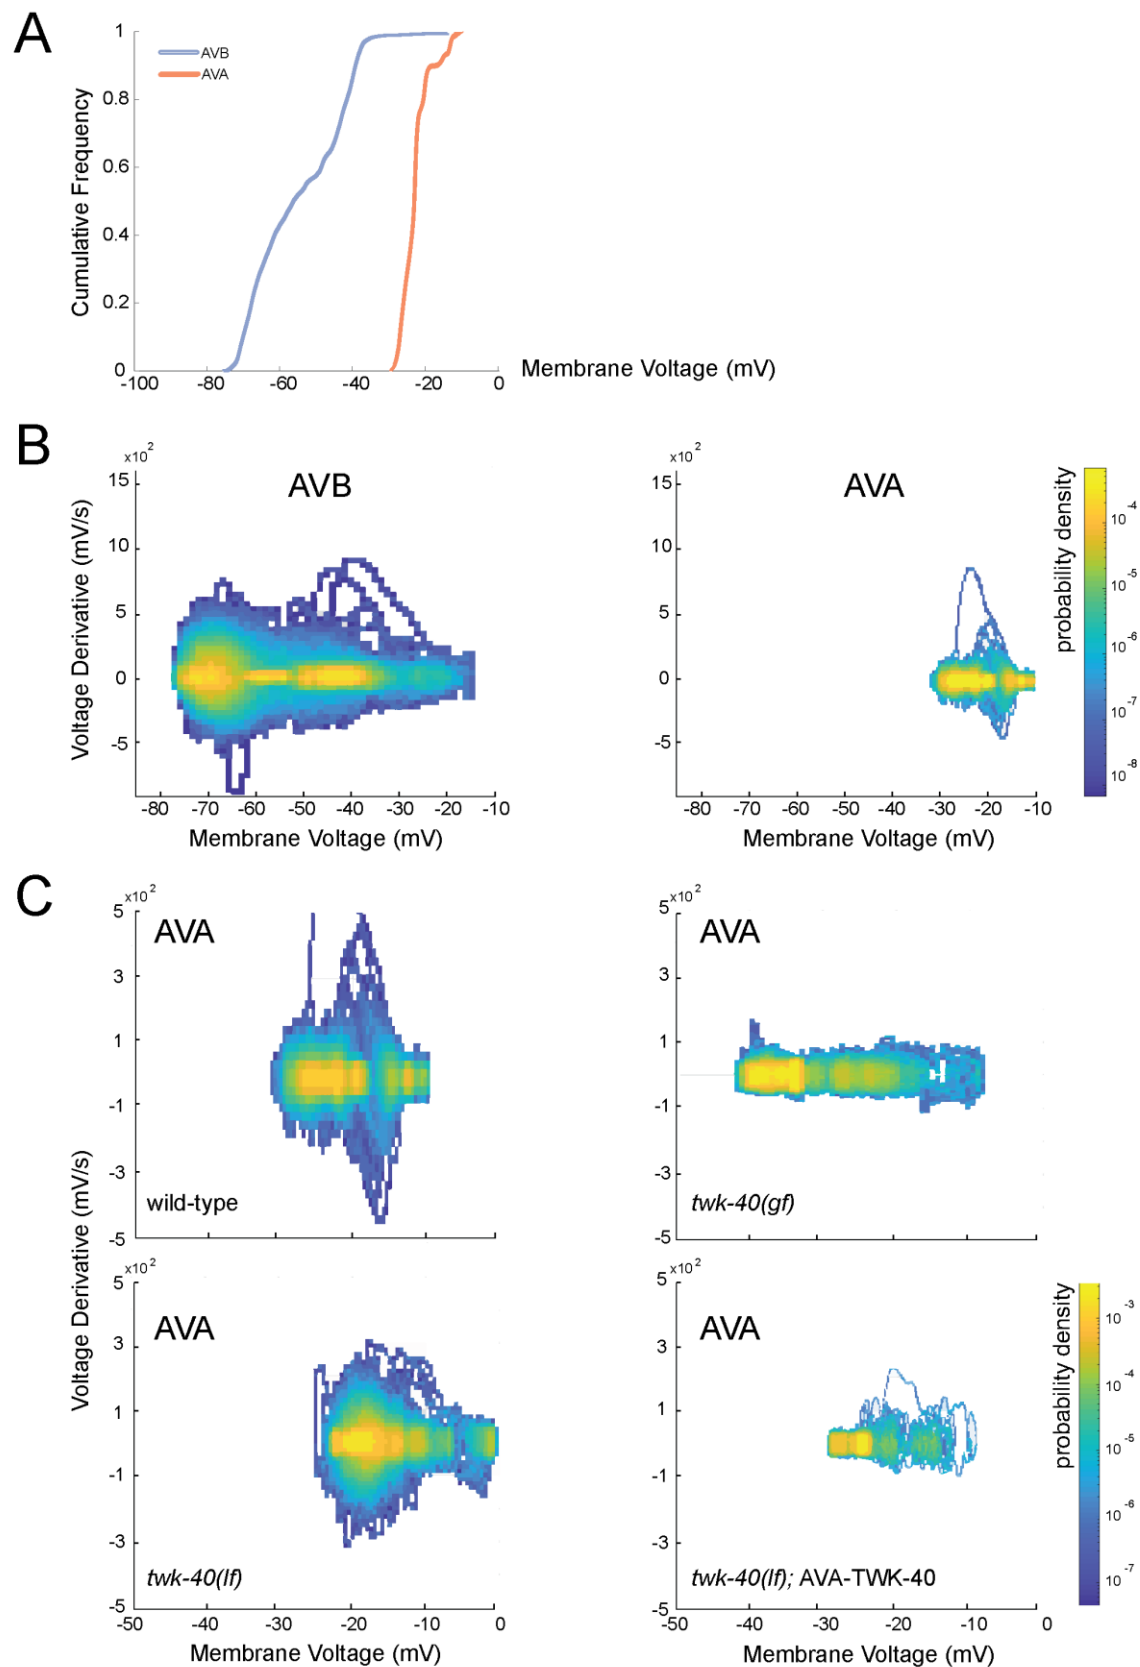

**Figure 1S1. TWK-40 regulates AVA's membrane potential.**

- A. AVA holds a more depolarized membrane potential than AVB. Cumulative frequency of the membrane potential of AVB (n=8) and AVA (n=7), with no current injection.
- B. AVA and AVB exhibit relatively steady potentials at different voltages. The dynamic range of potential changes for AVB (n=8) and AVA (n=7), is shown by the distribution of voltage derivatives across their membrane potentials.
- C. Changing K<sup>+</sup> leak changes both the range and the dynamic range of AVA's membrane potential. Distribution of voltage derivatives across AVA's membrane potentials shows an increase and decrease of the range and dynamic range in *twk-40(lf)* (n=9) and *twk-40(gf)* (n=13) animals, respectively. AVA-specific restoration of TWK-40 in *twk-40(lf)* mutants (n=8) decreased AVA's membrane potential and reduced the dynamic range, similar to *twk-40(gf)* mutant animals.

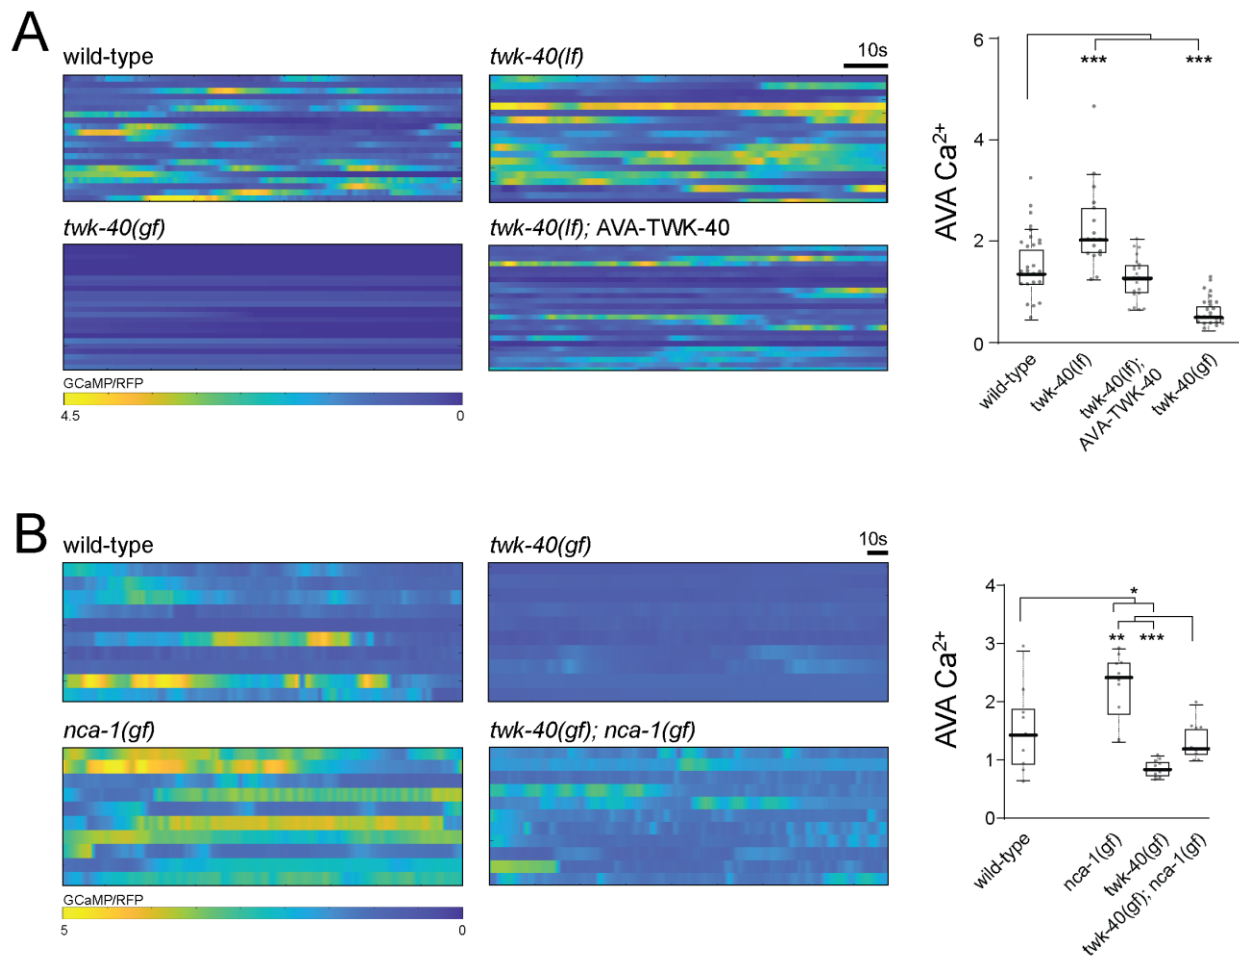

560



**Figure 1S2. Genetic interactions between the TWK-40 K<sup>+</sup> leak and NCA Na<sup>+</sup> leak channel mutants corroborate an antagonizing effect on AVA activity.**

- A. Raster plots (left panels) and quantification (right panels) of AVA soma calcium activity in freely moving wild-type (n=20), *twk-40(lf)* (n=17), *twk-40(lf); AVA-specific TWK-40* (n=24) and *twk-40(gf)* (n=24) animals. Each trace in the raster plot represents the recording of one animal over time. GCaMP/RFP ratio denotes calcium activity; \* denotes statistical significance.
- B. Raster plots (left panels) and quantification (right panel) of AVA soma calcium activity in freely moving animals of denoted genotype. Consistent with their motor phenotypes<sup>104</sup>, increasing Na<sup>+</sup> leak (*nca-1(gf)*, n=9) correlates with increased AVA calcium activity than wild-type animals (n=10), and partially compensated for AVA's activity dampened by increased K<sup>+</sup> leak (*twk-40(gf); nca-1(gf)*, n=11). GCaMP/RFP ratio denotes calcium activity; \* denotes statistical significance.

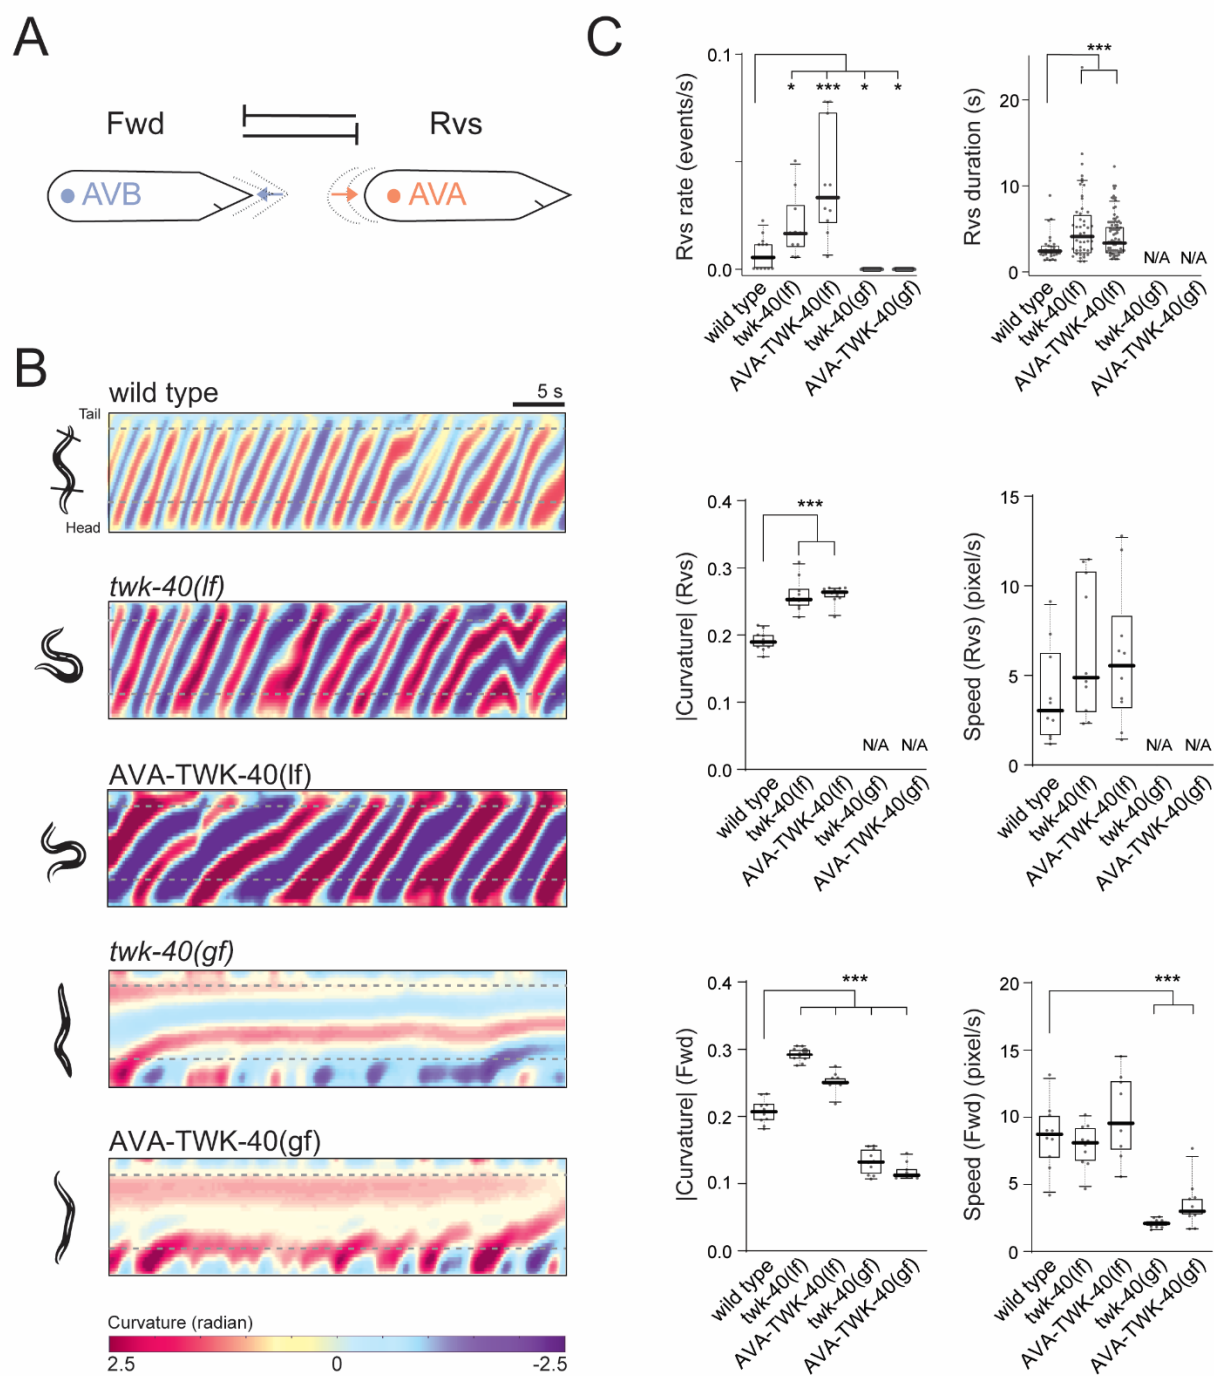

575

## Figure 2. AVA regulates both forward and backward movements.

- A. Mutual exclusion between the forward (Fwd) and backward (Rvs) motor states is considered to reflect the reciprocal antagonisms between AVB and AVA, the respective principal premotor interneurons of the forward and backward motor circuit.
- B. Representative kymograph of bending curvature of a freely moving animal of denoted genotype. Segments between dashed lines denote the body. A bending wave from head to tail over time denotes forward movement, and from tail to head backward movement. Deeper colors denote higher curvatures. *twk-40(lf)* and AVA-specific TWK-40(lf) animals show increased curvature. *twk-40(gf)* and AVA-specific TWK-40(gf) animals exhibit severely diminished body bending.
- C. Quantification of initiation rate of reversals, centroid velocity, and body curvature. (Top) Averaged reversal rates (Rvs, left) and reversal duration (right) exhibited by animals of denoted genotypes. *twk-40(lf)* (n: 46 events from 11 animals) and AVA-specific TWK-40(lf) (80 events from 11 animals) animals exhibit increased Reversal rates and duration compared to wild-type animals (30 events from 13 animals). (Middle) Mean absolute body curvature and speed during forward movement by animals of denoted genotypes. (Bottom) Mean absolute body curvature and speed during backward movement. n: 11 (wild type), 11 (*twk-40(lf)*), 11 (AVA-specific TWK-40(lf)), 11 (*twk-40(gf)*) and 12 (AVA-specific TWK-40(gf)) animals. N/A: no events.



## Figure 2S1. TWK-40 functions primarily through AVA to regulate body curvature

- A. Genomics structures of *twk-40* and predicted three isoforms (a, b, and c). Blue boxes and lines denote exons and introns, respectively. Red and green boxes denote the C-terminal insertion of TagRFP and ZF domains.
- B. Mean absolute bending curvature (left panel) and speed (right panel) of wild-type (n=11) and *twk-40::TagRFP::ZF* (n=11) animals. Insertion of TagRFP::ZF does not change locomotion.
- C. Mean absolute bending curvature during forward (left) and backward (right) movement in respective genotypes. AVA-specific restoration of TWK-40 expression in *twk-40(lf)* mutants (n=11) decreased *twk-40(lf)* mutant's curvature (n=10) to wild-type level (n=11). "-" denotes the absence of a transgene that drives TWK-40 expression in AVA. "+" denotes the presence of a transgene that drives TWK-40 expression in AVA. \* denotes statistical significance.
- D. Immuno-staining of a strain carrying an integrated, functional, multi-copy TWK-40::GFP fosmid array against GFP revealed 18 classes of neurons with different levels of expression. Scale bar, 2µm.
- E. Mean absolute curvature during forward movement exhibited by animals with cell-specific depletion of TWK-40. "-": in the absence of ZIF-1, a ubiquitin ligase that degrades *twk-40::RFP::ZF*, animals exhibited wild-type-like bending. "all": expressing ZIF-1 in all TWK-40-expressing neurons led to increased bending, similar to *twk-40(lf)* mutants. The mean curvature of animals expressing ZIF-1 in denoted TWK-40-expressing neurons showed that those included AVA led to increased curvature. \* denotes statistical significance.

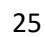



## Figure 2S2. AVA maintains forward movement.

- A. Ablation of AVA in the absence of motor neurons of the reversal motor circuit led to reduced bending and speed during forward movement. Representative kymograph of bending curvature (left panels), averaged absolute body curvature (middle panels) and averaged speed (right panels) upon co-ablation in wild-type (control, n=13; ablated, n=11) and *twk-40(lf)* (control, n=11; ablated, n=11) background are shown. \* denotes statistical significance.
- B. Representative kymograph of bending curvature (left), mean absolute curvature, and velocity in non-stimulated (-ATR) (n=28) and stimulated (+ATR) animals that express GtACR2 specifically in AVA (n=25). Curvature and forward speed were reduced during stimulation. Lines and shaded bars denote the median and 95% confidence interval, respectively. \* denotes statistical significance.
- C. Raster plots (left) and quantification (right) of an overall AVA calcium activity (GCaMP/RFP ratio) in freely moving animals. Each trace represents one animal. AVA-specific TWK-40(lf) (n=23) and AVA-specific TWK-40(gf) (n=27) animals exhibit increased and decreased mean calcium activity, respectively, compared to wild-type animals (n=23). \* denotes statistical significance.

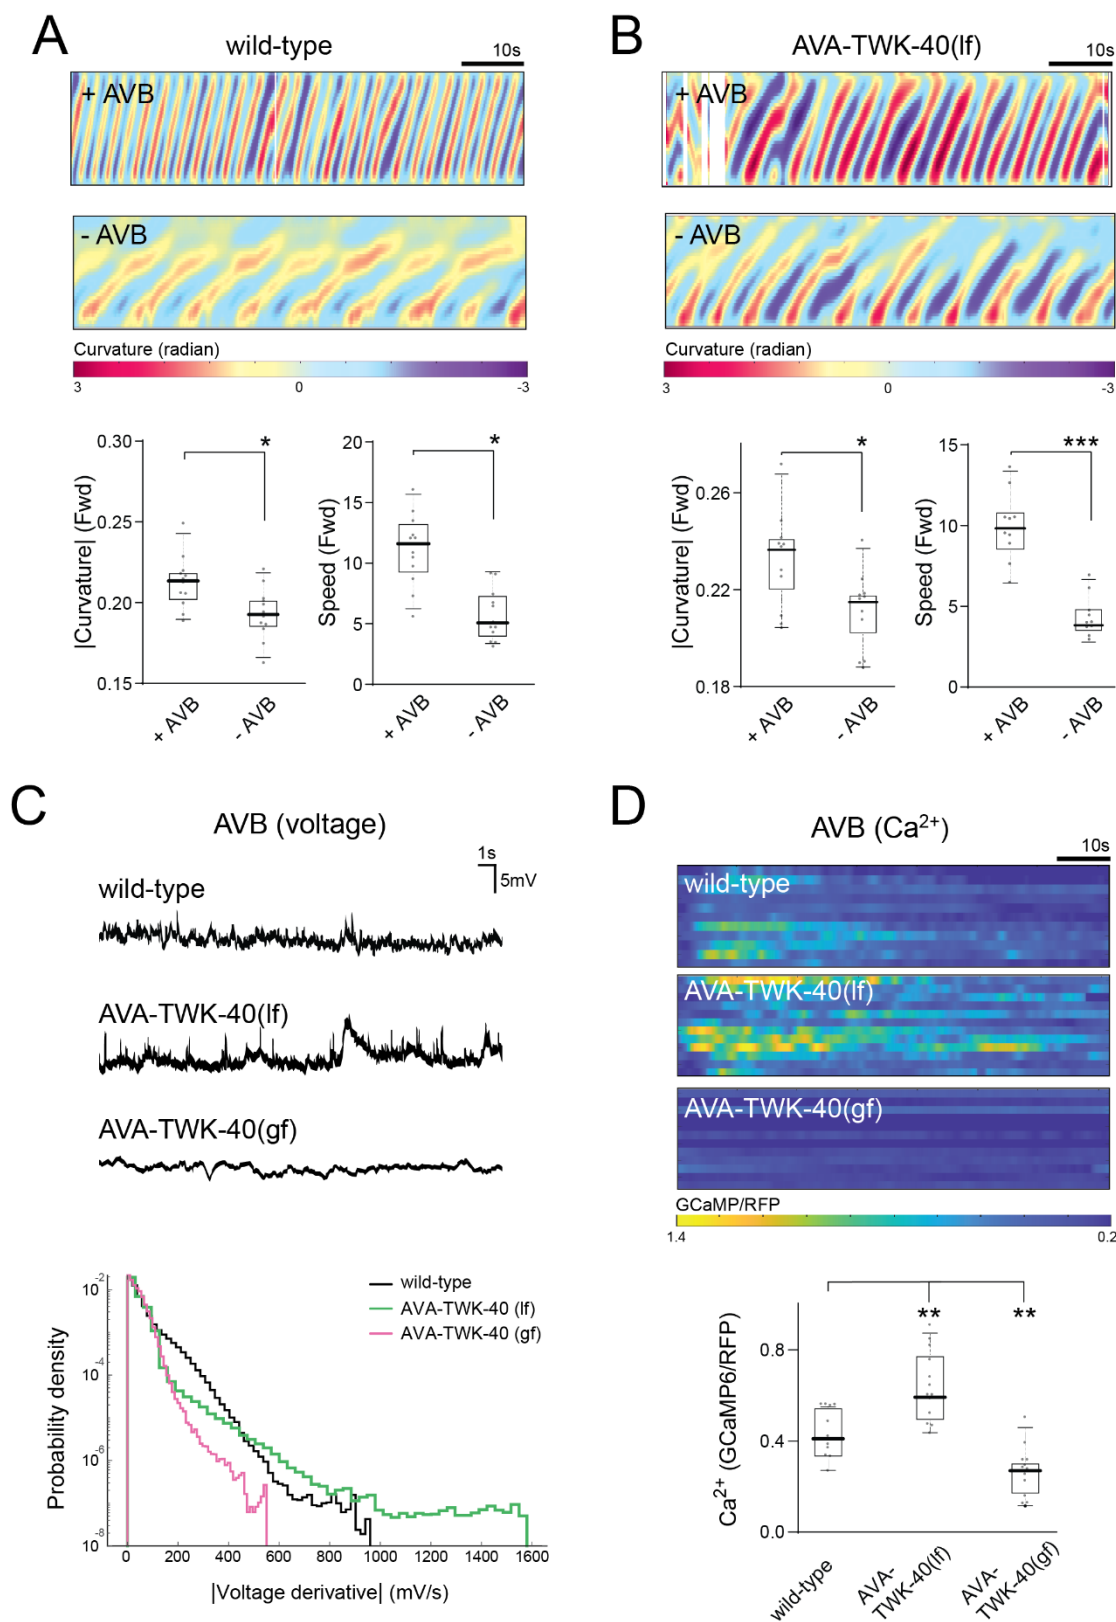

### **Figure 3. AVA positively regulates AVB's activity**

- A. Ablation of AVB led to significantly reduced curvature and speed during forward movement of wild-type animals. (Upper panel) Representative kymograph of body curvature of control (+AVB) (n=13) and AVB ablated (-AVB) animals (n=13). (Lower panel) Mean absolute curvature and speed during forward movement by animals of respective genotypes. \* denotes statistical significance.
- B. Ablation of AVB led to significantly reduced curvature and speed during forward movement of AVA-specific TWK-40(lf) animals. (Upper panel) Representative kymograph of body curvature of control (+AVB) (n=11) and AVB ablated (-AVB) animals (n=11) in AVA-specific TWK-40(lf) mutant animals. (Lower panel) Mean absolute curvature and speed during forward movement by animals of respective genotypes. \* denotes statistical significance.
- C. (Upper panel) Representative AVB membrane potential recording of respective genotypes in the absence of current injection. (Lower panel) Quantification of AVB membrane potential changes when AVA's membrane potential was changed. AVB exhibited increased and decreased dynamics in AVA-specific TWK-40(lf) (n=7) and AVA-specific TWK-40(lf) (n=8) mutant animals, respectively, compared to wild-type animals (n=8).
- D. Raster plot (Upper panel) and quantification (lower panel) of AVB calcium activity during forward movement, in freely moving wild-type (n=12), AVA-specific TWK-40(lf) (n=14), and AVA-specific TWK-40(gf) animals (n=13). Each trace represents one animal. AVB exhibited increased and decreased activities in AVA-TWK-40(lf) and AVA-specific TWK-40(gf) animals, respectively, compared to wild-type animals. \* denotes statistical significance.

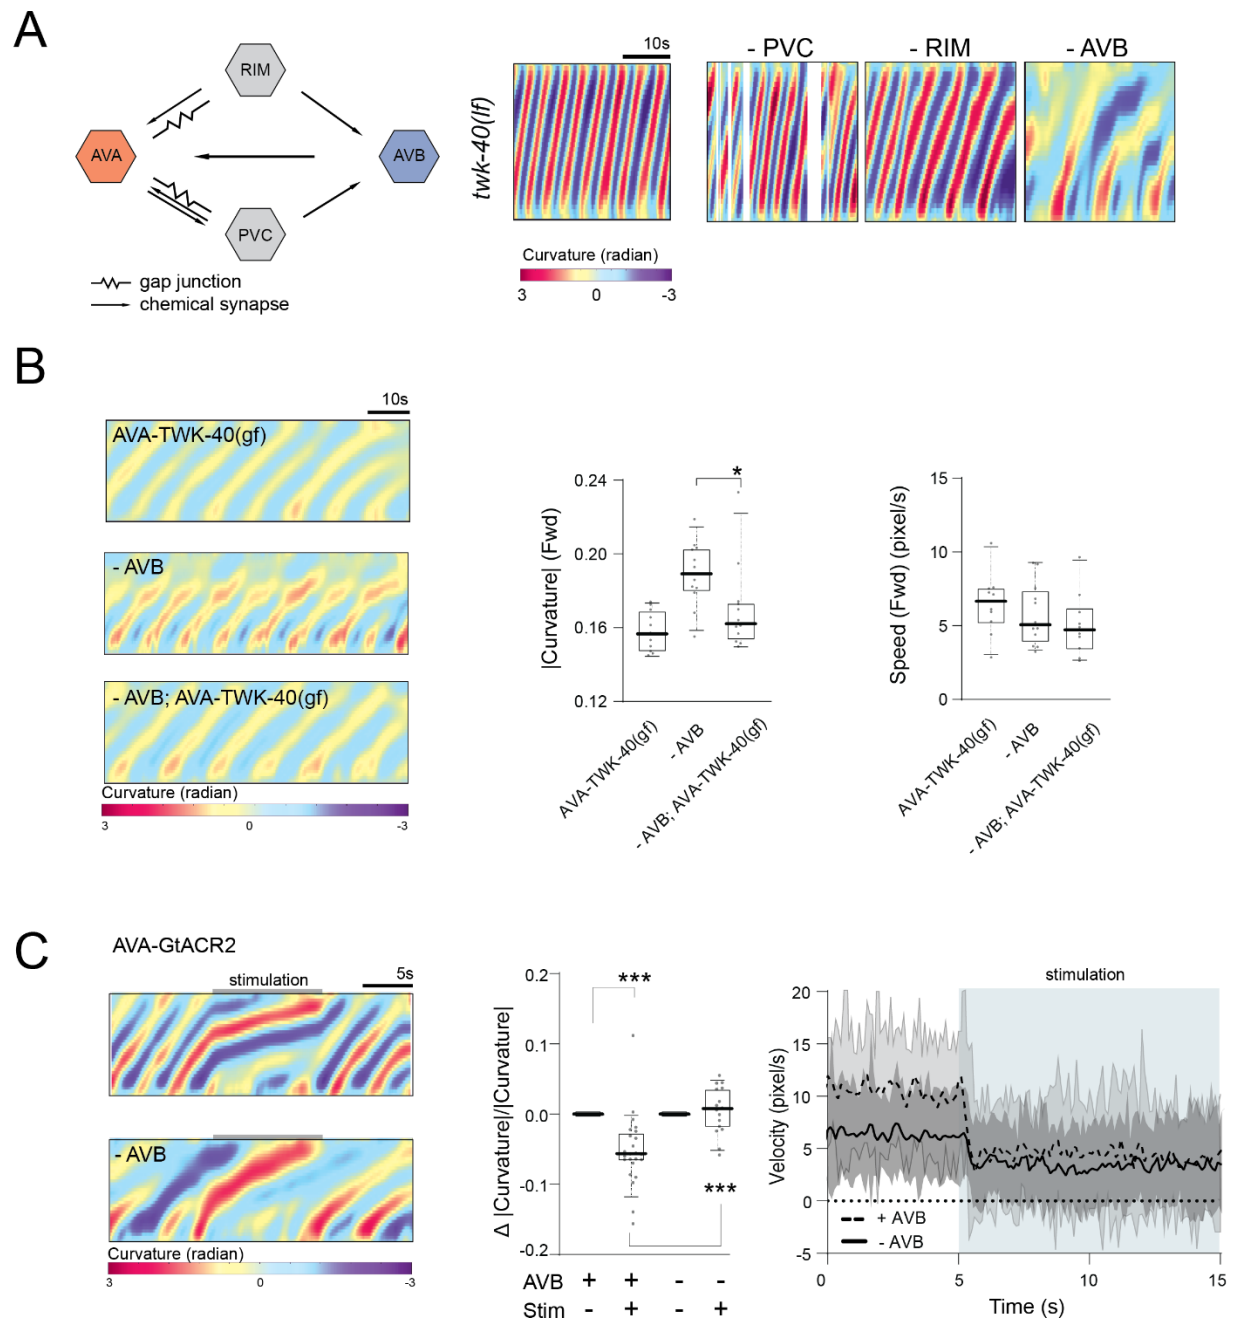

658

### Figure 3S1. AVA's effect on forward movement requires AVB

- A. (Left) Anatomic connectivity between AVA and AVB. (Right) Representative kymograph of bending curvature of *twk-40(lf)* animals, upon ablation of neurons that make chemical and/or gap junction connections with AVA, -PVC, -RIM, -AVB, in *twk-40(lf)* mutant animals, Only AVB ablation led to decreased bending.
- B. (Left) Representative kymograph of bending curvature. (Middle) Mean absolute curvature during forward movement for AVA-specific TWK-40(*gf*) (n=11), AVB ablated (-AVB) wild-type animals (n=13), and AVB ablated AVA-TWK-40(*gf*) animals (n=11). (Right) Averaged forward speed of animals with respective genotypes. Ablating AVB did not cause significant further attenuation of the forward movement of AVA-specific TWK-40(*gf*) animals. \* denotes statistical significance.
- C. (Left) representative kymograph of bending curvature of wild-type (+AVB) (n=25) and AVB ablated (-AVB) animals (n=17) upon weak stimulation of GtACR2 expressed specifically in AVA. (Middle and right panel) Mean forward speed and absolute curvature of animals of denoted genotype. Ablation of AVB partially blocked the inhibitory effect of AVA-specific GtACR2 activation on forward movement. Lines and shaded bars denote the median and 95% confidence interval, respectively. \* denotes statistical significance.

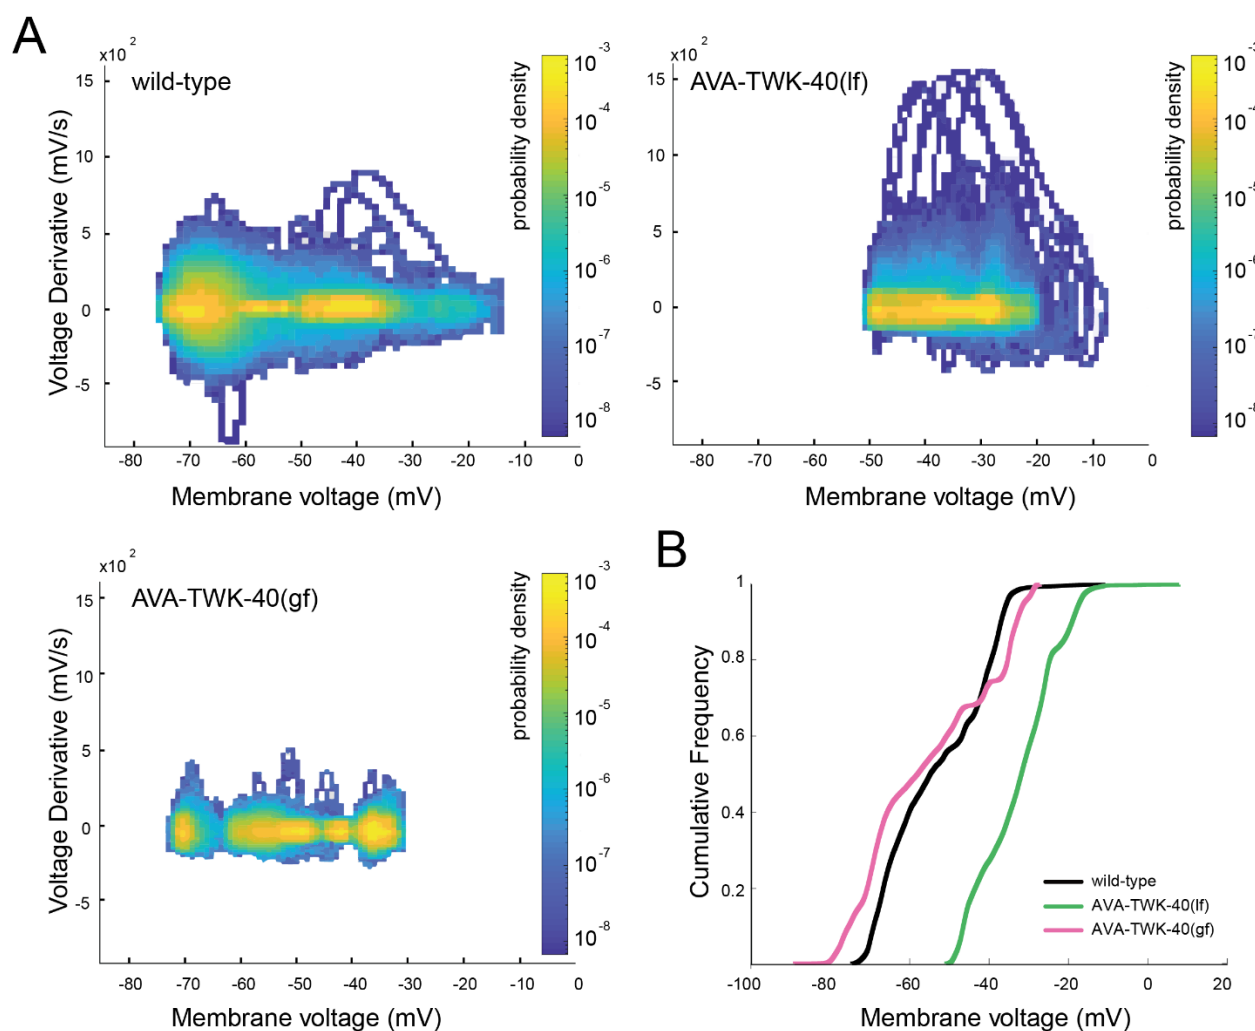

676



**Figure 3S2. AVB's membrane potential and voltage dynamics are positively regulated by AVA**

- A. Distribution of the voltage derivatives across AVB membrane potential in respective genotypes. AVA-specific *TWK-40(lf)* (n=7) and AVA-specific *TWK-40(gf)* (n=7) led to increased and decreased voltage dynamic ranges, respectively, compared to wild-type animals (n=8).
- B. Cumulative fraction of AVB membrane potential. AVA-specific *twk-40(lf)* (n=7) and AVA-specific *twk-40(gf)* (n=7) led to a more depolarized and hyperpolarized potential range, respectively, compared to wild-type animals (n=7) for AVB.

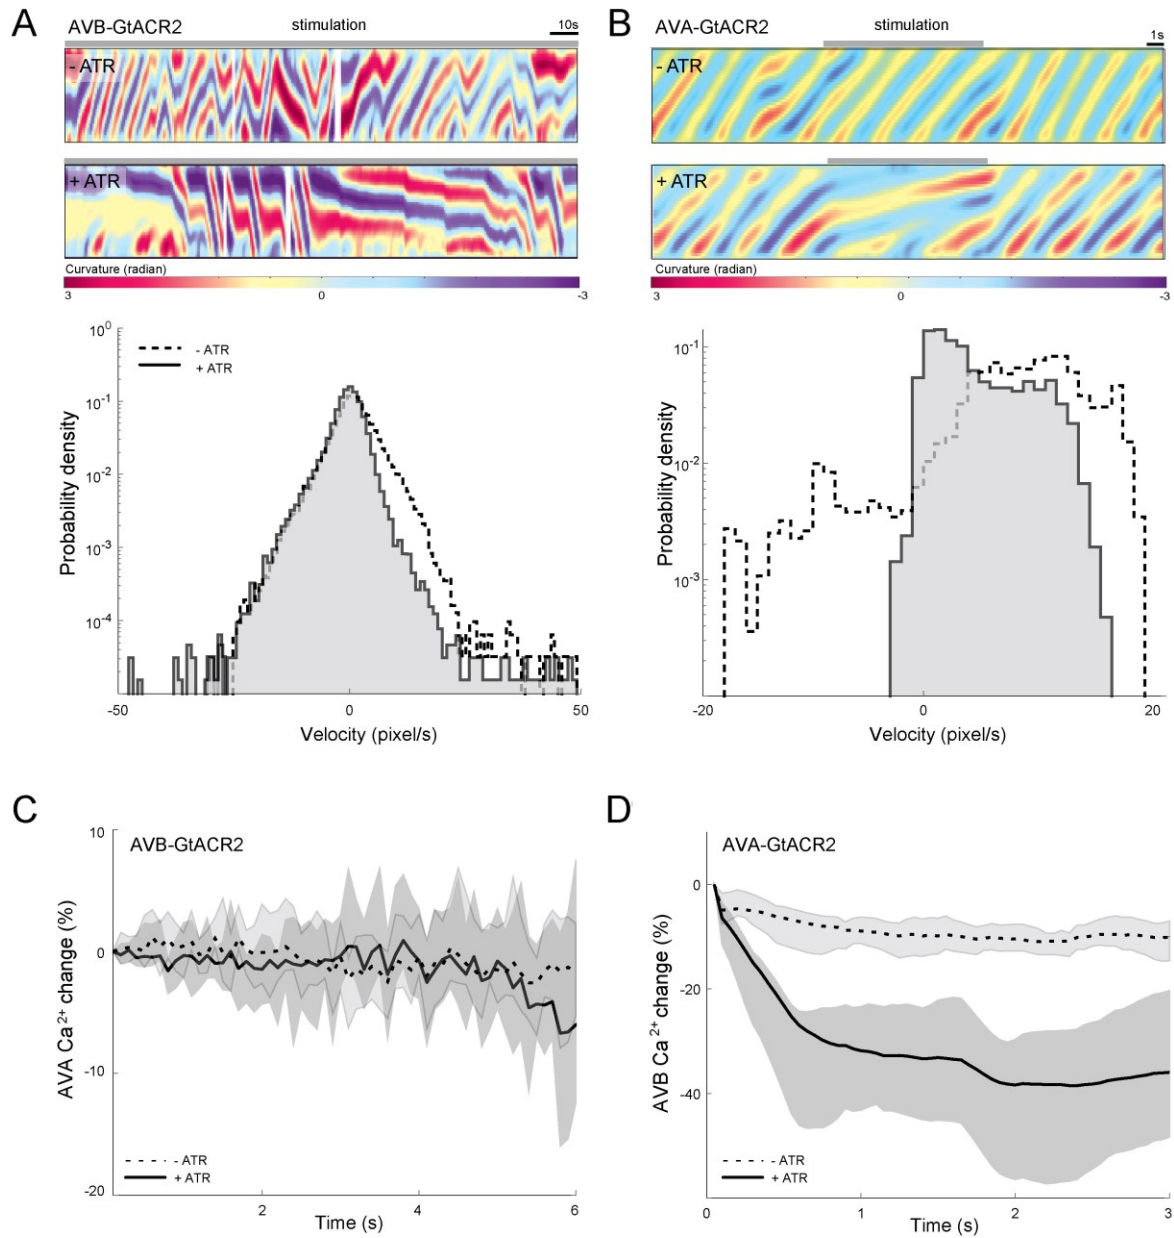

686

# **Figure 4. Asymmetry in AVA-AVB communication.**

- A. Representative kymographs (per panel) and normalized probability density (lower panel) of body curvature upon optogenetic silencing by AVB by GtACR2. Silencing AVB (ATR+, n=11) led to decreased forward speed without affecting backward movement compared to non-stimulated animals (-ATR, n=5).
- B. Representative kymographs (upper panel) and normalized probability density (lower panel) of bending curvature of animals pre-, during, and post-optogenetic silencing of AVA by GtACR2. Silencing AVA (+ATR, n=28) led to decreased forward speed and diminished backward movement compared to un-stimulated (-ATR, n=25) animals.
- C. AVA calcium activity in immobilized animals upon optogenetic silencing of AVB by GtACR2. Inactivation of AVB (+ATR, n=28) did not lead to obvious changes in AVA calcium dynamics compared to un-stimulated animals (-ATR, n=19). Lines and shaded bars denote the median and 95% confidence interval, respectively.
- D. AVB calcium activity in immobilized animals upon optogenetic silencing of AVA by GtACR2. Inactivation of AVA (+ATR, n=23) led to reduced AVB calcium dynamics compared to un-stimulated animals (-ATR, n=23). Lines and shaded bars denote the median and 95% confidence interval, respectively.

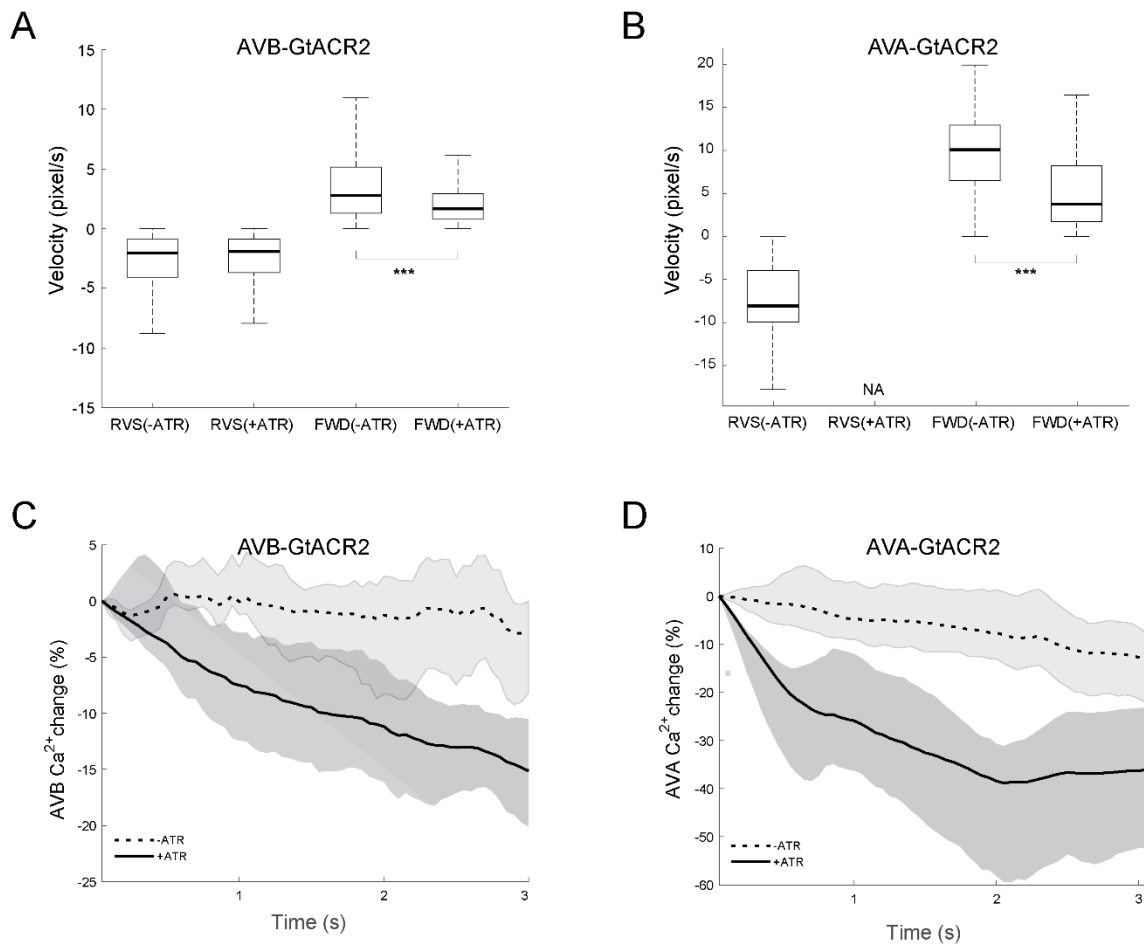

704

**Figure 4S. Asymmetry in AVA-AVB communication.**

- A. AVB silencing by optogenetic stimulation (+ATR, n=11) led to decreased forward speed (Fwd) without affecting backward speed (Rvs) compared to un-stimulated (-ATR, n=5) animals. \* denotes statistical significance.
- B. AVA silencing by optogenetic stimulation (+ATR, n=28) led to decreased forward speed (Fwd) and abolished backward movement (Rvs, NA) compared to un-stimulated (-ATR, n=25) animals. \* denotes statistical significance.
- C. Optogenetic silencing of AVB by GtACR2 in immobilized animals led to reduced AVB calcium activity (+ATR, n=28) compared to un-stimulated (-ATR, n=19) animals. Lines and shaded bars denote the median and 95% confidence interval, respectively.
- D. Optogenetic silencing of AVA by GtACR2 in immobilized animals led to reduced AVA calcium activity (+ATR, n=23) compared to unstimulated (-ATR, n=23) animals. Lines and shaded bars denote the median and 95% confidence interval, respectively.

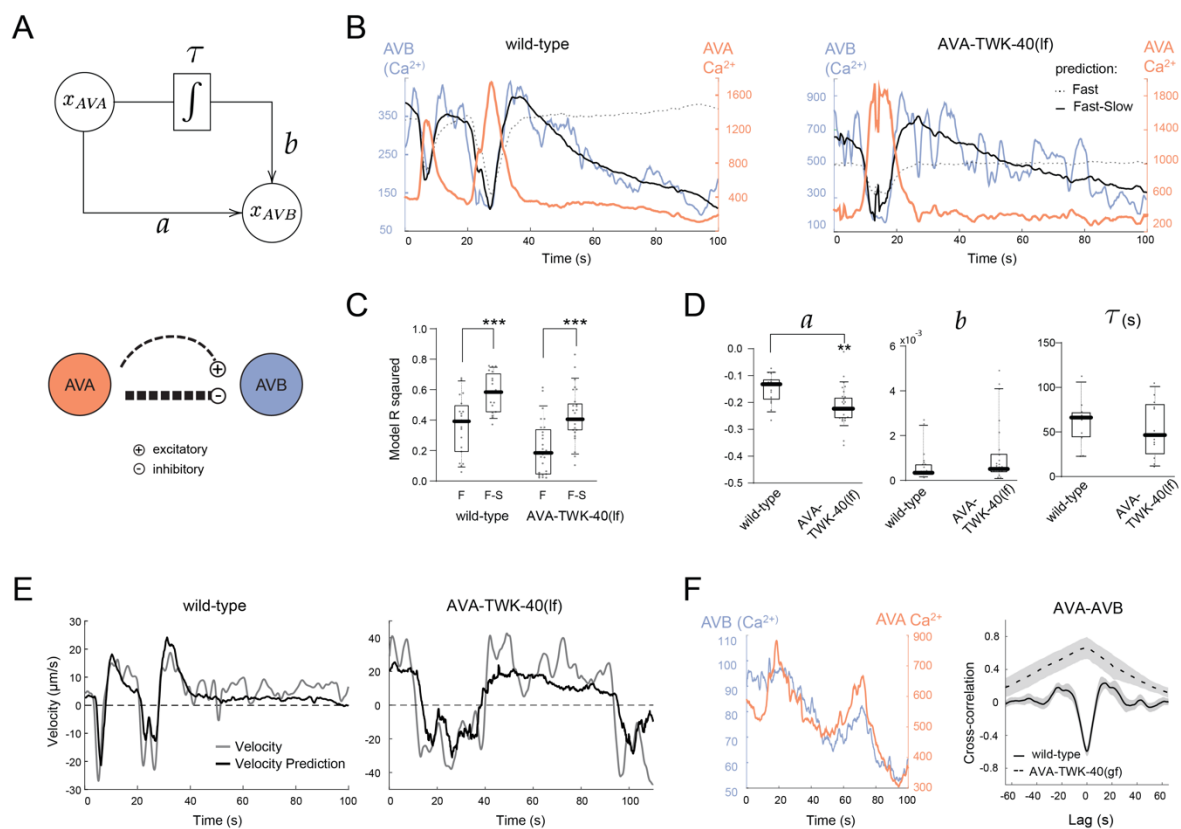

718

**Figure 5. A two-time scale model captures AVA's relationship with AVB and velocity.**

- A. (Top) AVB activity is modeled as a sum of two terms dependent on AVA's activity. A fast-negative copy with a proportionality constant  $a$  and a slow positive copy integrated with a timescale  $\tau$  and proportionality constant  $b$ . (Bottom) Biologically, the two-time scale model suggests a fast inhibition and a slow excitation from AVA to AVB.
- B. (Left) Example calcium traces of co-imaged AVA and AVB in freely moving animals show that in the wild-type animal, the fast-slow model is a better fit for AVB's post-reversal activity compared to a model without the slow timescale. (Right) Example calcium traces of AVA and AVB from AVA-specific TWK-40(lf) animals show that the fast-slow model also explains AVB's activity when AVA was further depolarized.
- C. Model R-squared values comparing the performance of the fast-slow model with the fast models in wild-type and AVA-specific-40(lf) animals. Removing the slow time scale decreases model performance in both cases. \* denotes statistical significance.
- D. Comparison of the estimated value for parameters  $a$ ,  $b$ , and the integration timescale for the slow copy  $\tau$  between wild-type and AVA-specific TWK-40(lf) traces.  $n = 11$  (wild type) and 10 (AVA-specific TWK-40(lf)) reversal events. WT=11 animals, AVA-specific TWK-40(lf)=13 animals. \* denotes statistical significance.
- E. Sample traces of the model prediction of the velocity of wild-type (Left) and AVA-specific TWK-40(lf) (Right) animals from AVA calcium activity. Wild-type parameters:  $a = -0.51, b = 0.02, \tau = 3.5s$ ; AVA-specific TWK-40(gf) parameters:  $a = -0.38, b = 0.004, \tau = 16.6s$ .
- F. AVA-specific-TWK-40(gf) negatively affects AVA and AVB activity. (Left) Rare calcium traces for AVA and AVB in AVA-specific-TWK-40(gf) mutants showed a strong positive correlation. (Right) Cross-correlation between residual AVA and AVB calcium activities showed a more positive correlation for AVA-specific TWK-40(gf) ( $n = 13$  events, 11 animals) than wild-type ( $n=29$  events, 11 animals).



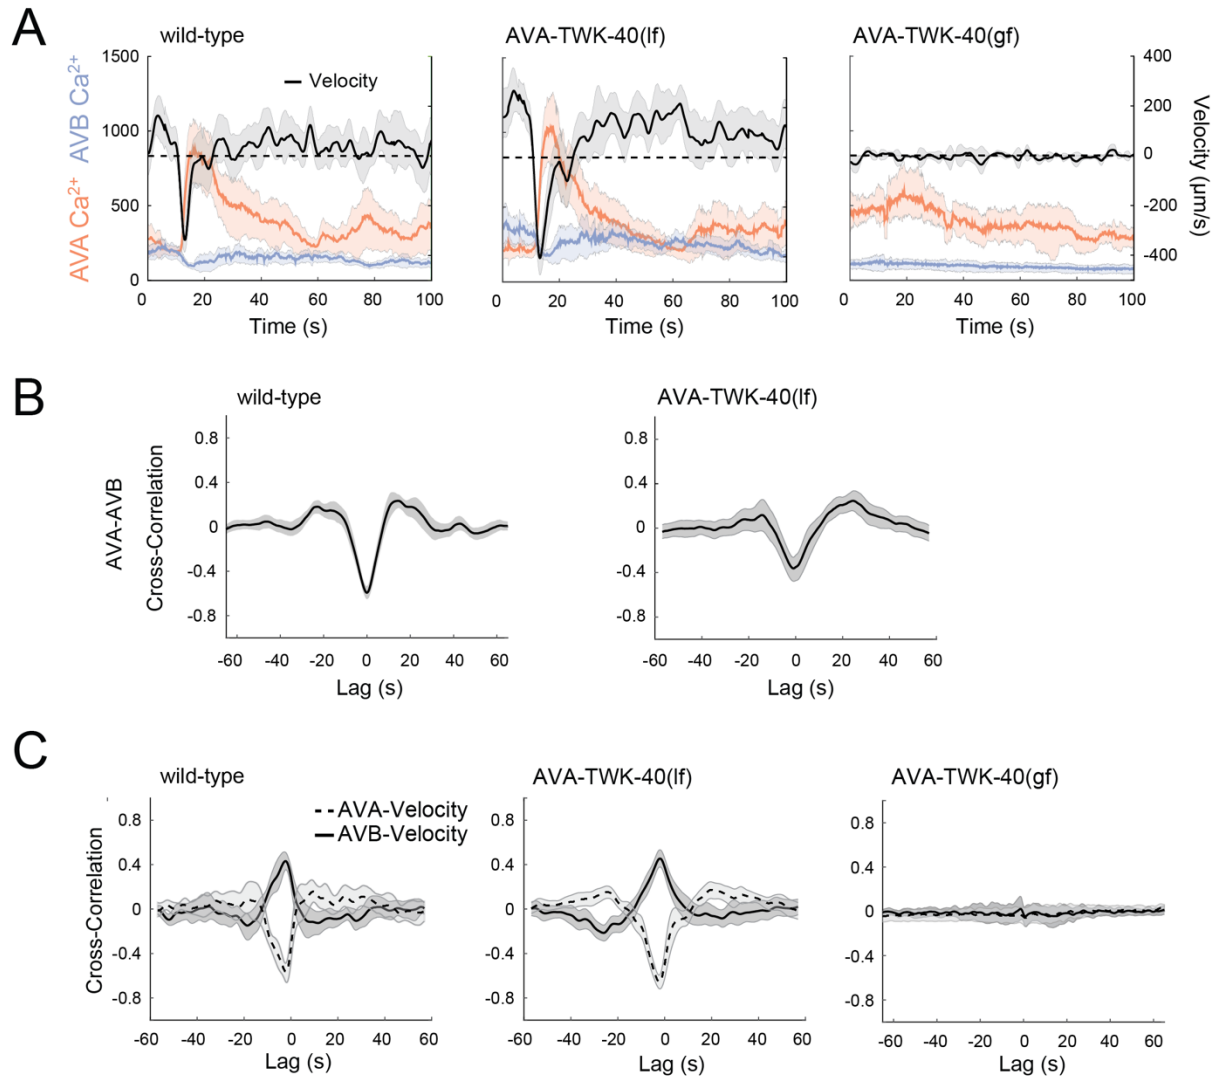

744

**Figure 5S. A two-time scale model captures the AVA-AVB calcium relationship.**

- A. Average calcium activity of AVA (orange trace) and AVB (blue trace), aligned to the start of an AVA transient for wild-type, AVA-specific TWK-40(lf), and AVA-specific TWK-40(gf) animals, respectively. Velocity (green trace) is plotted in the right y-axis. . n (events): 19 (wild-type), 27 (AVA-specific TWK-40(lf), 4 (AVA-specific TWK-40(gf)). Lines and shaded bars indicate 95% confidence interval of the mean.
- B. Averaged cross-correlations between AVA-AVB calcium activity for wild-type and AVA-specific TWK-40(lf) animals.
- C. Averaged cross-correlations between AVA calcium activity and velocity, and AVB calcium activity and velocity, for wild-type, AVA-specific TWK-40(lf), and AVA-specific TWK-40(gf) animals.

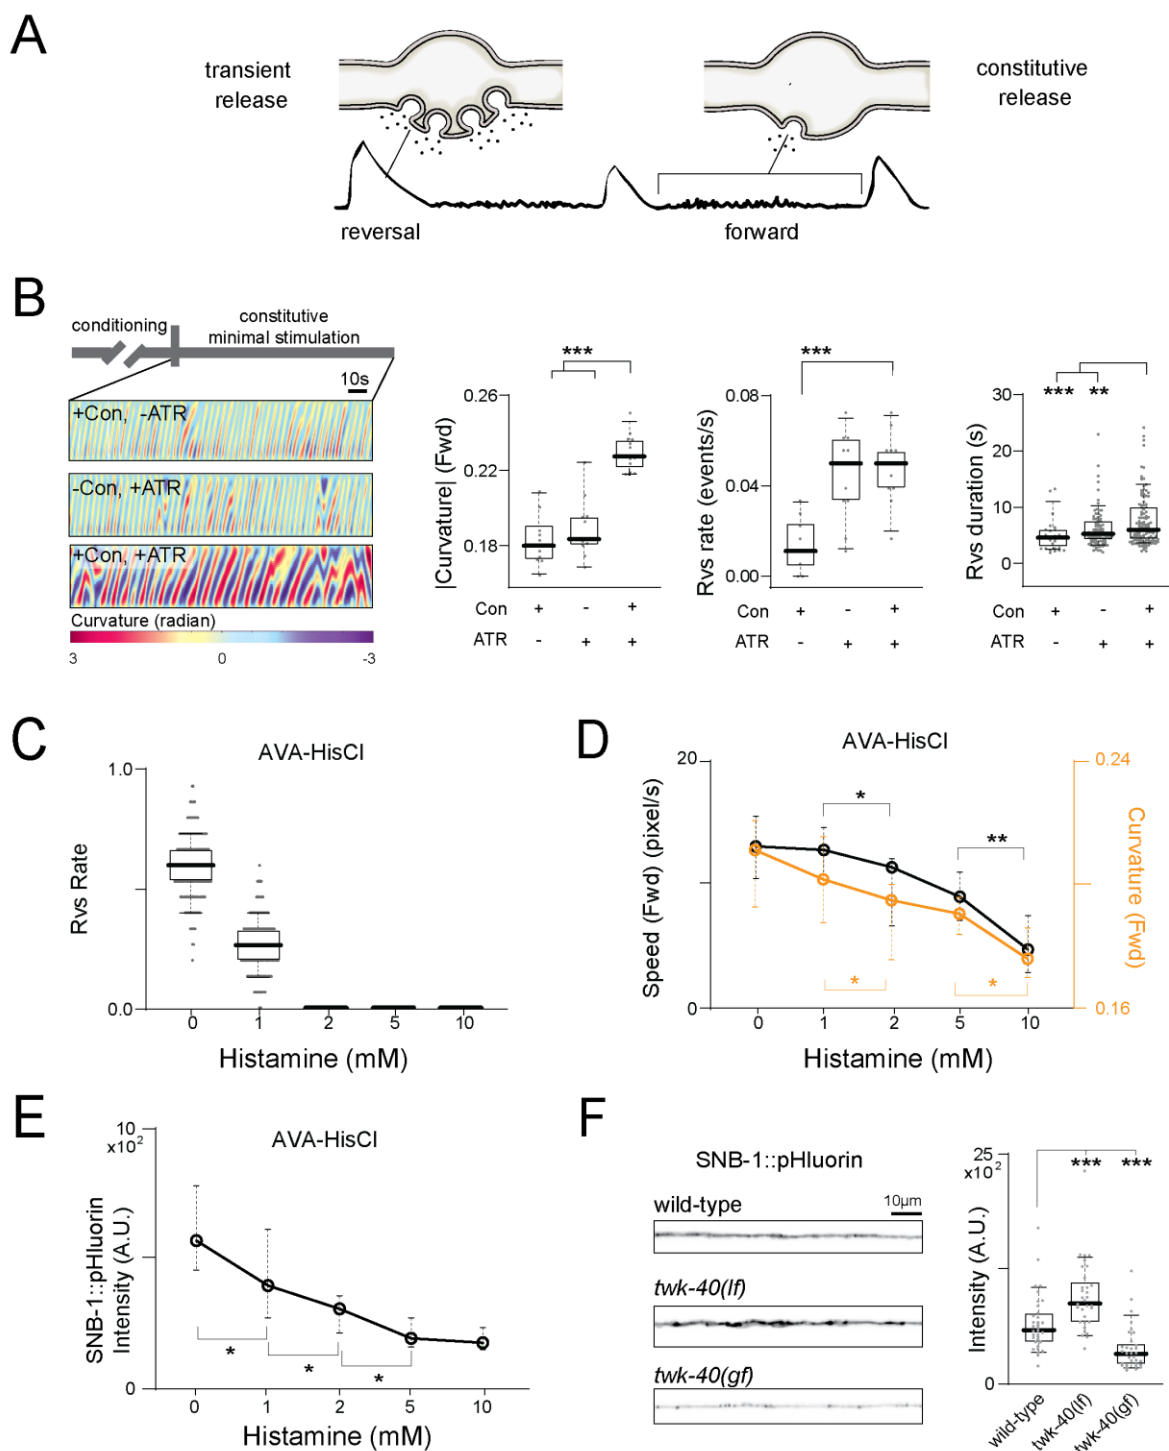

756

**Figure 6. AVA regulates forward movement through chemical synaptic transmission.**

- A. Schematics of the transient versus constitutive neurotransmitter release from AVA.
- B. (Left) Representative curvature kymographs of AVA-specific optogenetic activation, with pre-conditioning but no stimulation (+Con, -ATR, n=10), with stimulation without pre-conditioning (-Con, +ATR, n=10), and with stimulation after pre-conditioning (+Con, +ATR, n=14). (Right) Averaged absolute forward curvature, reversal rate, and reversal duration under each condition. Animals with weak stimulation exhibited only an increased reversal rate. Animals with constitutive, minimal stimulation exhibited increased reversal rate and forward curvature. \* denotes statistical significance.
- C. Exposing AVA-HisCl animals to histamine-impaired spontaneous reversals (Rvs). n=15 animals for each concentration. 2mM histamine diminished spontaneous reversals.
- D. Forward speed (left) and absolute curvature (right) at different histamine concentrations showed a gradual reduction with increased histamine (n=15 animals per concentration). \* denotes statistical significance.
- E. Averaged AVA-SNB-1::pHluorin fluorescent signals at different histamine concentrations showed a gradual increase with increased histamine. n: 30 (0 mM), 29 (1 mM), 30 (2 mM), 31 (5mM), 28 (10 mM). \* denotes statistical significance.
- F. Schematics, representative image, and quantification of AVA-specific SNB-1::pHluorin signals in wild-type (n=34), *twk-40(lf)* (n=32), and *twk-40(gf)* (n=32) animals. pHluorin signals were significantly increased and decreased in *twk-40(lf)* and *twk-40(gf)*, respectively, compared to wild-type animals. \* denotes statistical significance.

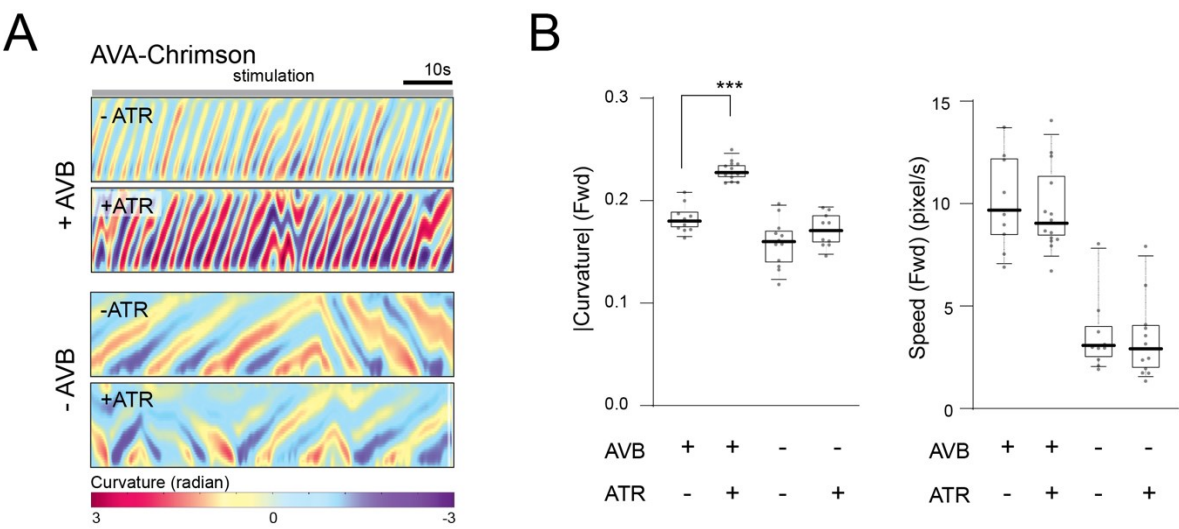

778

# **Figure 6S. AVA's constitutive activation of forward movement requires AVB**

- A. Representative curvature kymographs of AVA-specific Chrimson animals upon a constitutive and minimal AVA activation (+ATR), with (+) or without (-) the premotor interneuron AVB. - ATR, no stimulation controls.
- B. Averaged absolute curvature (left) and speed (right) during forward movement upon AVA's constitutive and minimal activation, with (+) or without (-) AVB. Upon AVB Ablation (-AVB), constitutive and minimal activation of AVA no longer induced an increase in the forward movement. n: 10 (+AVB; -ATR, no stimulation), 13 (+AVB; +ATR, with stimulation), 12 (-AVB, -ATR, no stimulation), and 10 (-AVB; +ATR, with stimulation). \* denotes statistical significance.

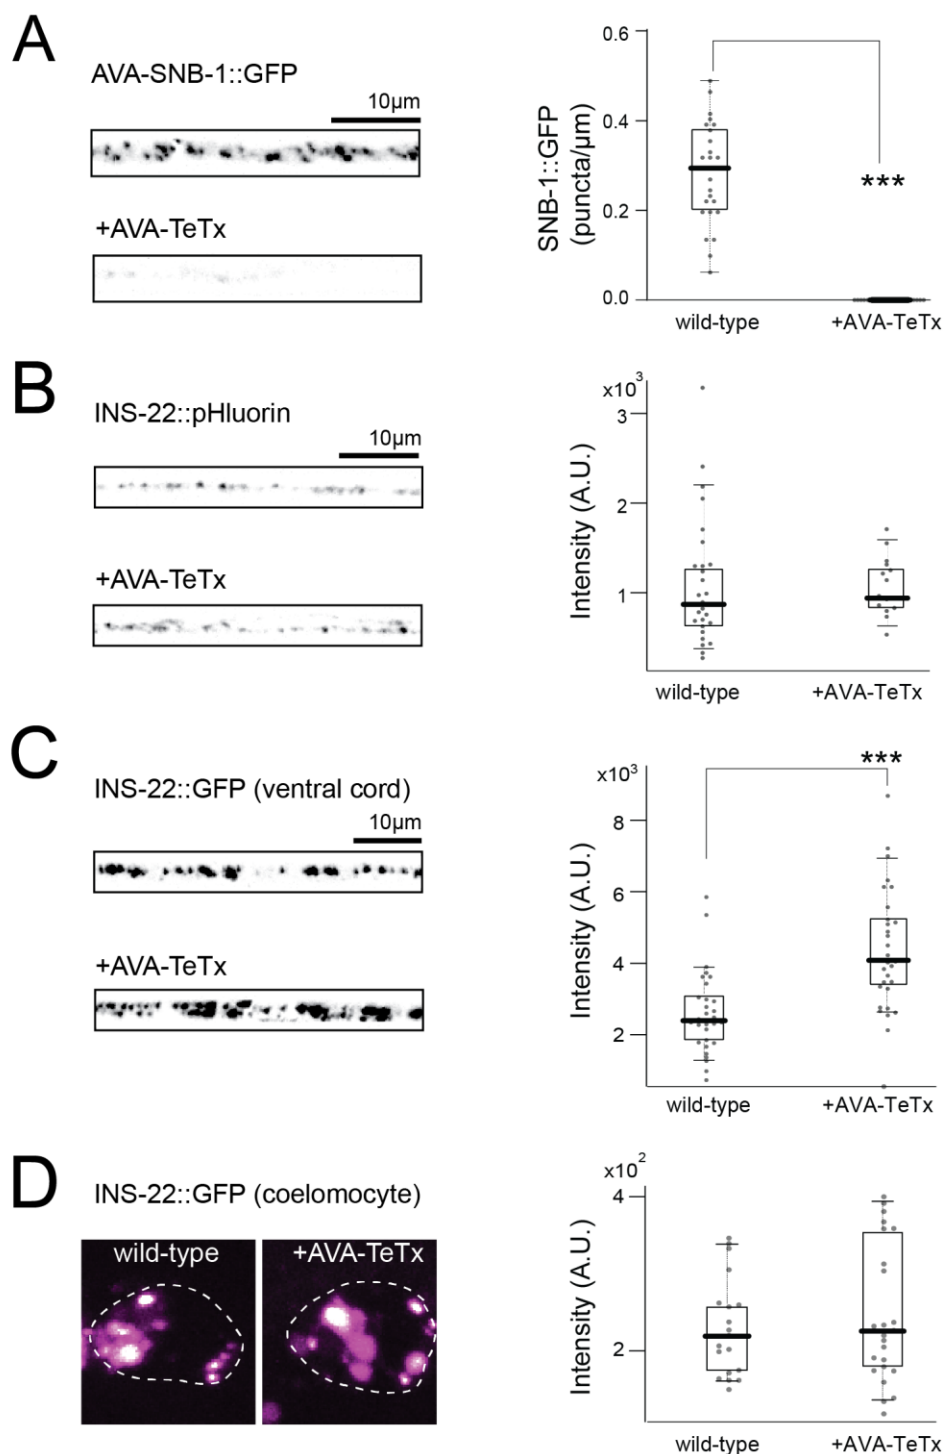

791



## **Figure 7. TeTx does not significantly impair neuropeptide secretion from AVA**

- A. Representative images (left) and quantification (right) of SNB-1::GFP signals from AVA in wild-type animals and animals that express AVA-specific TeTx. SNB-1::GFP signals were diminished in the presence of TeTx (n=22) compared to wild-type animals (n=25). \* denotes statistical significance.
- B. Representative images (left) and quantification (right) of the INS-22::pHluorin signals from AVA showed no significant changes in the presence of AVA-specific TeTx (n=15) compared to wild-type animals (n=27).
- C. Representative images (left) and quantification (right) of signals from a neuropeptide marker INS-22::GFP from AVA. Averaged INS-22::GFP intensity of each puncta (right) showed an increase of fluorescent intensity in the presence of AVA-specific TeTx (n=30) compared to wild-type animals (n=30). \* denotes statistical significance.
- D. Representative images (left) and quantification (right) of INS-22::GFP signals in coelomocytes, which accumulate secreted neuropeptides. Averaged INS-22::GFP intensity showed no difference between wild-type (n=20) and AVA-specific TeTx (n=26) animals.

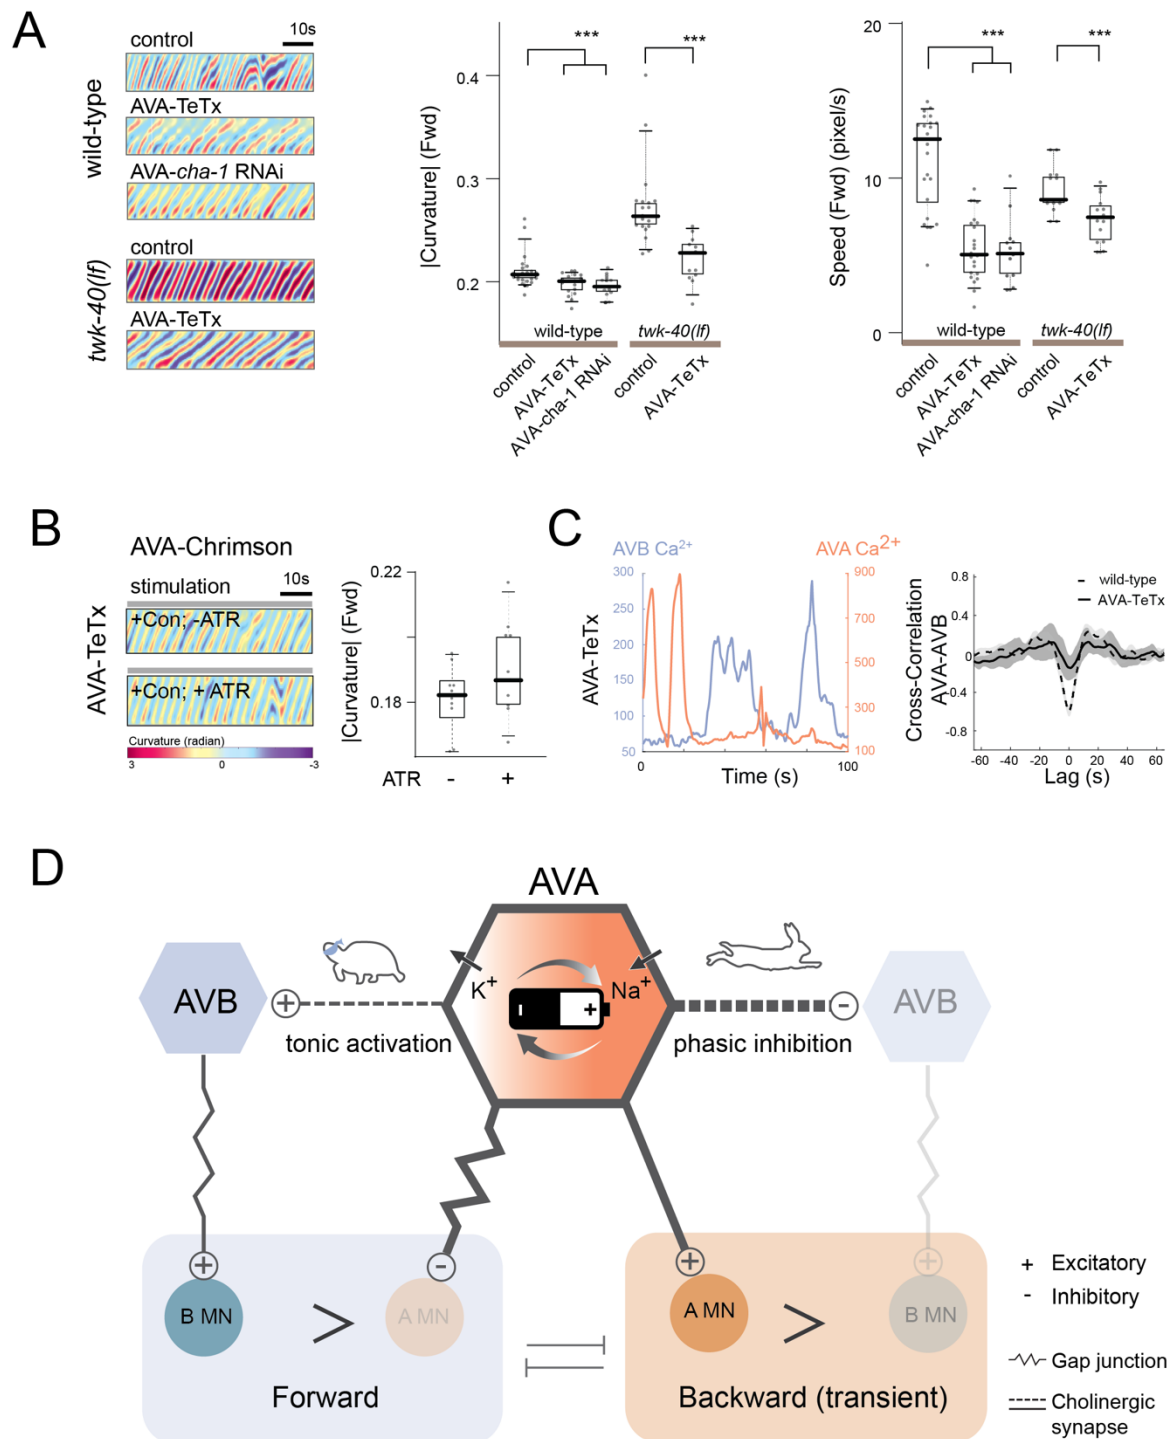

808

# **Figure 8. Cholinergic signaling underlies AVA's regulation of forward movement**

- A. Representative curvature kymographs (left), averaged absolute curvature (middle), and averaged speed (right), during forward movement by animals with blocked synaptic vesicle fusion (AVA-TeTx), or blocked acetylcholine loading (AVA-*cha-1* RNAi) from AVA. Curvature and speed were reduced in AVA-specific TeTx in both wild-type and *twk-40(lf)* animals. AVA-*cha-1* RNAi had a similar effect on forward movement as AVA-TeTx. n: 23 (Control, wild type), 18 (AVA-specific TeTx, wild type), 14 (AVA-*cha-1* RNAi, wild type), 20 (Control, *twk-40(lf)*), 14 (AVA-specific TeTx, *twk-40(lf)*). \* denotes statistical significance.
- B. (Left panels) Representative curvature kymographs upon AVA's constitutive and minimal stimulation (+ATR) in the presence of TeTx. Animals of the same genotype were treated with the same treatment but with opsin-activating factor (-ART) served as controls. (Right panels) Averaged absolute forward curvature. When synaptic vesicle fusion was blocked, stimulation of AVA (+ATR) resulted in no significant changes in forward movement compared to non-stimulated (-ATR) animals. n: 10 (-ATR), 11 (+ATR).
- C. (Left) Example calcium traces of co-imaged AVA and AVB in freely moving AVA-specific TeTx animals. (Right) Cross-correlation of co-imaged AVA and AVB showed reduced anti-correlation in AVA-specific TeTx animals (n=10) compared to wild-type animals (n=19).
- D. AVA functions as a master regulator to modulate forward and backward movement and coordinate their transitions. (Left side) At a lower activity state, AVA actively shunts reversal motor neuron A by gap junction-coupling<sup>26</sup>. At this state, AVA's tonic acetylcholine transmission potentiates AVB to activate the B motor neurons for sustained forward movement. (Right side) When AVA is at a high activity state, its phasic activation inhibits AVB while potentiating A motor neurons by transient acetylcholine transmission to initiate backward movement. Arrows between the low and high AVA states denote continuous modulations of velocity during transitions between the mutually exclusive motor states. Dashed and straight lines denote extrasynaptic/indirect and synaptic connectivity, respectively. Line thickness denotes synaptic strength.

838

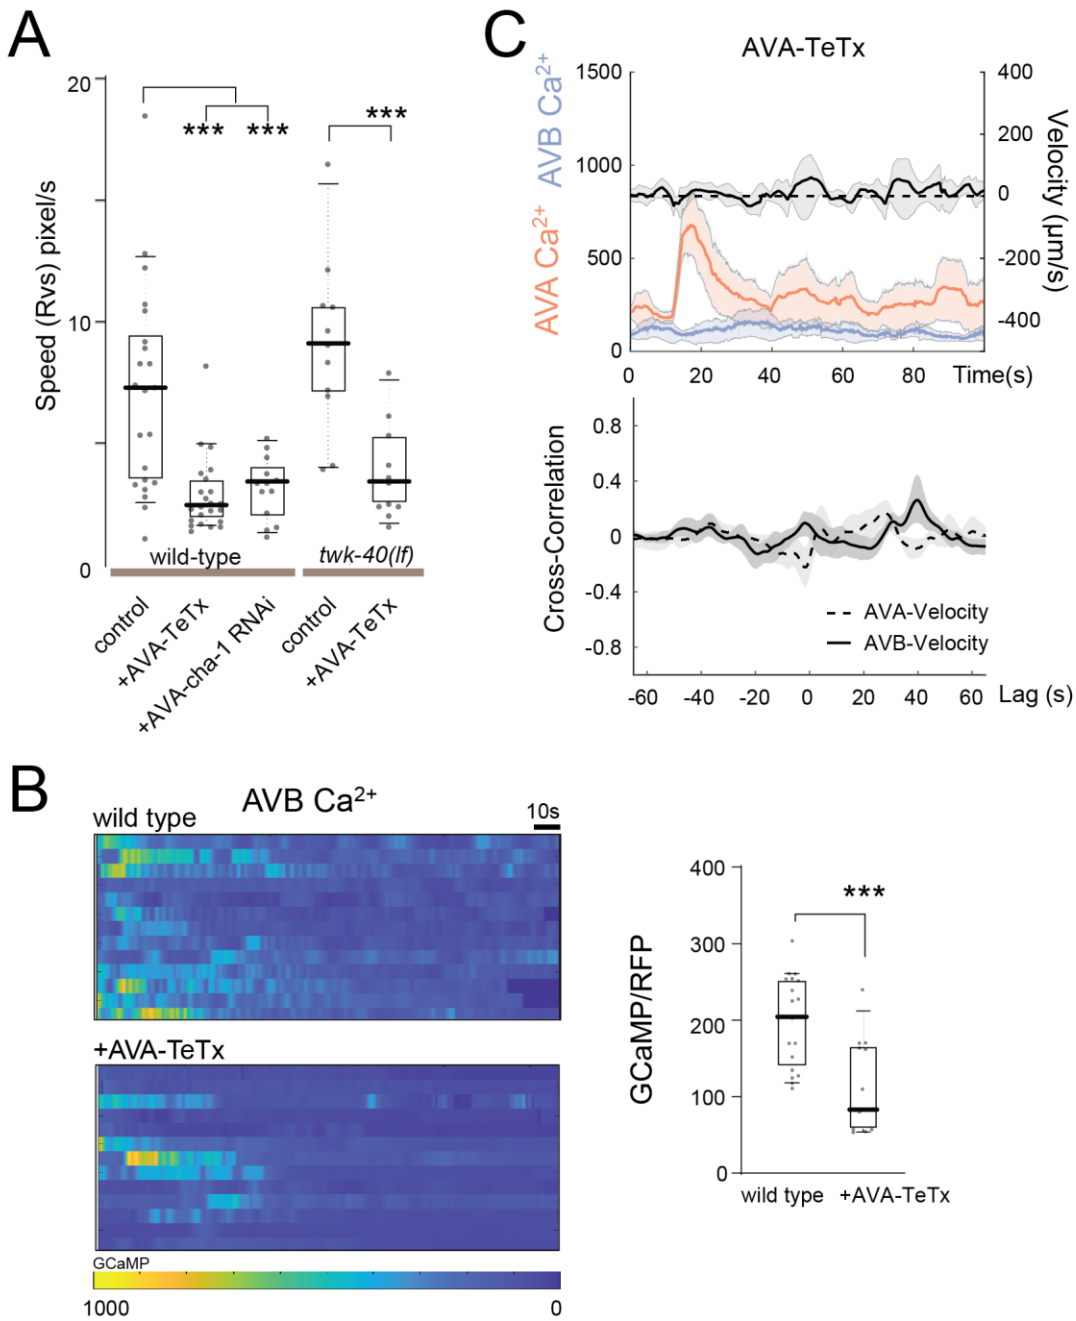

839

# **Figure 8S. Chemical synaptic and cholinergic signaling from AVA positively regulates overall motor activity**

(A) Blocking chemical synaptic transmission from AVA reduces reversal speed. In the wild-type background, AVA-specific expression of TeTx (n=20 animals) resulted in reduced speed during reversals, an effect shared by AVA-specific *cha-1* RNAi transgene (n=14 animals). Wild type control: n=18 animals. In *twk-40(lf)* background, AVA-specific expression of TeTx also reduced their reversal speed (n=21 animals). when compared to animals without TeTx expression, *twk-40(lf)* control: n=14 animals. \* denotes statistical significance.

(B) Blocking chemical synaptic transmission from AVA reduces AVB calcium activity. Raster plots (left) and quantification (right) of AVB calcium activity in freely moving wild type and AVA-specific TeTx animals. Each line represents one animal. In AVA-specific TeTx animals, overall AVB calcium activity was decreased. n: 20 (wild type), 13 (AVA-specific TeTx). TeTx attenuates AVA's constitutive potentiation on forward movement.

(C) Blocking chemical synaptic transmission from AVA disrupts correlations between AVA, AVB, and velocity. (Left) Mean velocity and calcium traces of co-imaged AVA and AVB in freely-moving AVA-specific TeTx animals. (Right) Cross-correlations between AVA calcium and velocity, and AVB calcium and velocity in AVA-specific TeTx animals. n: 19 (wild-type), 10 (AVA-specific TeTx). \* denotes statistical significance.

**Movie S1. Ablation of PVC or RIM in wild-type animals does not change forward curvature or disrupt transition between the forward-backward motor states.**

Representative movies of freely moving animals with or without ablation of either PVC or RIM neurons. Non ablated refers to wild-type background animals carrying the respective miniSOG transgene for PVC or RIM ablation, but without light exposure. Ablation of PVC or RIM led to increased reversal frequency, but did not change morphological parameters of the forward movement or motor state transition.

**Movie S2. Ablation of PVC or RIM in *twk-40(lf)* mutant animals does not reduce forward curvature or transitions between the forward-backward motor states.**

Representative movies of freely moving animals with or without ablation of either PVC or RIM neurons in *twk-40(lf)* mutants. *twk-40(lf)*; non ablated refers to *twk-40(hp834, lf)* animals carrying the respective miniSOG transgene for PVC or RIM ablation, but without light exposure. Ablation of PVC or RIM did not reduce the extend of forward bending or more frequent motor state transitions.

**Table 1: Membrane potentials of *C. elegans* neurons**

| Neuron class                   | Neuron | Approximate 'Rest' MP                           |
|--------------------------------|--------|-------------------------------------------------|
| Sensory neuron                 | AFD    | -40 mV <sup>99,105</sup> , -80 mV <sup>93</sup> |
| Sensory neuron                 | AWA    | -75 mV <sup>93,106</sup>                        |
| Sensory neuron                 | PLM    | -60 mV <sup>98</sup>                            |
| Sensory neuron                 | ASE    | -55 mV <sup>37</sup> -60mV <sup>107</sup>       |
| Sensory neuron                 | ASH    | -60 mV <sup>96</sup>                            |
| Interneuron                    | AIY    | -55 mV <sup>93</sup>                            |
| Interneuron                    | AIA    | -80 mV <sup>108</sup>                           |
| Premotor interneuron           | AVA    | -20 to -30 mV <sup>39,40,66</sup>               |
| Premotor interneuron           | AVB    | -75 to -55 mV (this study)                      |
| Premotor interneuron           | AVE    | -35 mV (S. Gao, unpublished)                    |
| <i>sra-11</i> expressed neuron | unsure | -20 mV <sup>109</sup>                           |
| Motor neuron                   | RMD    | -70 mV and -35 mV <sup>40</sup>                 |
| Motor neuron                   | RIM    | -40 mV <sup>93</sup>                            |
| Enteric motor neuron           | DVB    | -60 mV <sup>94</sup>                            |
| Enteric motor neuron           | AVL    | -40 mV <sup>94</sup>                            |
| Motor neuron                   | VA5    | -70 mV <sup>41</sup>                            |
| Motor neuron                   | VB6    | -50 mV <sup>41</sup>                            |
| Motor neuron                   | VD5    | -45 mV <sup>41</sup>                            |



**Table 2. Strains and constructs generated and/or used in this study**

| Strain                                                            | Genotype                        | Constructs         | Description (see Notes)                                                                                      | Figures                     |
|-------------------------------------------------------------------|---------------------------------|--------------------|--------------------------------------------------------------------------------------------------------------|-----------------------------|
| <b>Electrophysiology recording (visualization of AVA and AVB)</b> |                                 |                    |                                                                                                              |                             |
| ZM11177                                                           | <i>hpls860</i>                  | pJH4693            | [ <i>Ptwk-40s-eGFP; *Pmyo-2-wCherry</i> ]                                                                    | 1E, F; 1S1A, B; 3C; 3S2A, B |
| ZM11207                                                           | <i>twk-40(bln336); hpls860</i>  | pJH4693            | <i>twk-40(gf); [Ptwk-40s-eGFP; *Pmyo-2-wCherry]</i>                                                          | 1E, F; 1S1A, B; 3C; 3S2A, B |
| ZM11208                                                           | <i>twk-40(hp834); hpls860</i>   | pJH4693            | <i>twk-40(lf); [Ptwk-40s-eGFP; *Pmyo-2-wCherry]</i>                                                          | 1E, F; 1S1A, B; 3C; 3S2A, B |
| <b><i>twk-40</i> mutants and locomotion characterization</b>      |                                 |                    |                                                                                                              |                             |
| ZM8302                                                            | <i>twk-40(hp834)</i>            | CRISPR/Cas9        | <i>twk-40(lf)</i>                                                                                            | 2B, C; 2S1C, D              |
| JIP1514                                                           | <i>twk-40(bln336)</i>           | CRISPR/Cas9        | <i>twk-40(gf)</i>                                                                                            | 2B, C                       |
| JIP1368                                                           | <i>twk-40(bln282)</i>           | CRISPR/Cas9        | <i>twk-40::TagRFP::ZF</i>                                                                                    | 2S1B, D                     |
| ZM10113                                                           | <i>twk-40(bln282); hpls727</i>  | pJH3830            | <u>AVA-specific TWK-40(lf)</u><br><i>twk-40::TagRFP::ZF; [Prig-3-zif-1 sl2 RFP; *Pttx-3-GFP]</i>             | 2B, C                       |
| ZM10066                                                           | <i>hpEx4053</i>                 | pJH4203<br>pJH2673 | <u>AVA-specific TWK-40(gf)</u><br><i>[Prig-3-LoxP stop LoxP twk-40(gf)::GFP; Pnmr-1-Cre]</i>                 | 2B, C                       |
| ZM9662                                                            | <i>twk-40(hp834); hpEx3905</i>  | pJH4019<br>pJH2673 | <u>AVA-specific TWK-40 rescue</u><br><i>twk-40(lf); [Prig-3 FRT Stop FRT twk-40::GFP; Pnmr-1-FLP; *HygR]</i> | 2C                          |
| ZM9565                                                            | <i>twk-40(bln282); hpEx3909</i> | pJH3748            | <u>AVA, AVE, AVG-TWK-40(lf)</u><br><i>twk-40::TagRFP::ZF; [Pnmr-1 zif-1 sl2 RFP; *Pttx-3-GFP]</i>            | 2S1E                        |
| ZM9567                                                            | <i>twk-40(bln282); hpEx3908</i> | pJH3748            | <u>DVC-TWK-40(lf)</u><br><i>twk-40::TagRFP::ZF; [Pceh-63 zif-1 sl2 RFP; *Pttx-3-GFP]</i>                     | 2S1E                        |
| ZM9568                                                            | <i>twk-40(bln282); hpEx3912</i> | pJH3862            | <u>AVA, RIV-TWK-40(lf)</u><br><i>twk-40::TagRFP::ZF; [Pnpr-4 zif-1 sl2 RFP; *Pttx-3-GFP]</i>                 | 2S1E                        |
| ZM9632                                                            | <i>twk-40(bln282); hpEx3889</i> | pJH3775            | <u>AVA, AVB, AVE, SAB, SIA-TWK-40(lf)</u><br><i>twk-40::TagRFP::ZF; [PgIr-5 zif-1 sl2 RFP; *Pttx-3-GFP]</i>  | 2S1E                        |
| ZM9633                                                            | <i>twk-40(bln282); hpEx3890</i> | pJH3747            | <u>A,B-TWK-40(lf)</u><br><i>twk-40::TagRFP::ZF; [Pacr-2(s) zif-1 sl2 RFP; *Pttx-3-GFP]</i>                   | 2S1E                        |
| ZM9635                                                            | <i>twk-40(bln282); hpEx3891</i> | pJH3831            | <u>AVE-TWK-40(lf)</u><br><i>twk-40::TagRFP::ZF; [Popt-3 zif-1 sl2 RFP; *Pttx-3-GFP]</i>                      | 2S1E                        |

|                              |                                                      |                               |                                                                                                                                                                              |         |
|------------------------------|------------------------------------------------------|-------------------------------|------------------------------------------------------------------------------------------------------------------------------------------------------------------------------|---------|
| ZM9641                       | <i>twk-40(bln282); hpEx3892</i>                      | pJH3982                       | <u>TWK-40(lf) all neurons</u><br><i>twk-40::TagRFP::ZF;</i><br><i>[Prgef-1 zif-1 sl2 eBFP; *Pttx-3-GFP]</i>                                                                  | 2S1E    |
| ZM9646                       | <i>twk-40(bln282); hpEx3896</i>                      | pJH4012                       | <u>A, SAB-TWK-40(lf)</u><br><i>twk-40::TagRFP::ZF;</i><br><i>[Punc-4 zif-1 sl2 RFP; *Pttx-3-GFP]</i>                                                                         | 2S1E    |
| ZM9645                       | <i>twk-40(bln282); hpEx3897</i>                      | pJH4011                       | <u>AVB-TWK-40(lf)</u><br><i>twk-40::TagRFP::ZF;</i><br><i>[Plgc-55 zif-1 sl2 RFP; *Pttx-3-GFP]</i>                                                                           | 2S1E    |
| ZM9983                       | <i>twk-40(bln282); hpEx4034</i>                      | pJH4034                       | <u>SIA, SIB-TWK-40(lf)</u><br><i>twk-40::TagRFP::ZF;</i><br><i>[Pceh-24 zif-1 sl2 RFP; *Pmyo-2-RFP]</i>                                                                      | 2S1E    |
| <b>Immunostaining</b>        |                                                      |                               |                                                                                                                                                                              |         |
| ZM10652                      | <i>twk-40(bln282); hpEx4120</i>                      | pJH1371                       | <i>twk-40::TagRFP::ZF;</i><br><i>[Prgef-1-GPI::YFP]</i>                                                                                                                      | 1C      |
| ZM9778                       | <i>twk-40 (hp834); hpls444</i>                       | pJH3143                       | <i>hp834;</i><br><i>[twk-40::GFP fosmid]</i>                                                                                                                                 | 2S1D    |
| <b>AVA calcium imaging</b>   |                                                      |                               |                                                                                                                                                                              |         |
| ZM9059                       | <i>hpls580</i>                                       | pJH3631                       | <i>[Prig-3-GCaMP6s::wCherry; *Lin-15]</i>                                                                                                                                    | 1S2A, B |
| ZM9775                       | <i>twk-40(hp834); hpls580</i>                        | pJH3631                       | <i>twk-40(lf);</i><br><i>[Prig-3-GCaMP6s::wCherry; *Lin-15]</i>                                                                                                              | 1S2A    |
| ZM9818                       | <i>twk-40(bln336); hpls580</i>                       | pJH3631                       | <i>twk-40(gf);</i><br><i>[Prig-3-GCaMP6s::wCherry; *Lin-15]</i>                                                                                                              | 1S2A, B |
| ZM10044                      | <i>twk-40(hp834); hpls580; hpEx3905</i>              | pJH3631<br>pJH4019<br>pJH2673 | <u>with AVA-specific TWK-40 rescue</u><br><i>twk-40(lf);</i><br><i>[Prig-3-GCaMP6::wCherry; *Lin-15]</i><br><i>[Prig-3-FRT stop FRT twk-40;</i><br><i>Pnmr-1-FLP; *HygR]</i> | 1S2A    |
| ZM10283                      | <i>twk-40(bln282); hpls580; hpls727</i>              | pJH3631<br>pJH3830            | <u>with AVA-specific TWK-40(lf)</u><br><i>twk-40::TagRFP::ZF;</i><br><i>[Prig-3-GCaMP6s::wCherry; *Lin-15]</i><br><i>[Prig-3-zif-1 sl2 RFP]</i>                              | 2S2C    |
| ZM10346                      | <i>hpls580; hpEx4115</i>                             | pJH3631<br>pJH4316<br>pJH4237 | <u>with AVA-specific TWK-40(gf)</u><br><i>[Prig-3-GCaMP6s::wCherry; *Lin-15]</i><br><i>[Pflp-18-LoxP twk-40(gf) LoxP;</i><br><i>Ptwk-40s-Cre]</i>                            | 2S2C    |
| ZM8970                       | <i>nca-1 (hp102); hpls580</i>                        | pJH3631                       | <i>nca-1(gf);</i><br><i>[Prig-3-GCaMP6s::wCherry; *Lin-15]</i>                                                                                                               | 1S2B    |
| ZM10064                      | <i>nca-1 (hp102); twk-40 (bln336bln282); hpls580</i> | pJH3631                       | <i>nca-1(gf);</i><br><i>twk-40(gf)::ZF;</i><br><i>[Prig-3-GCaMP6s::wCherry; *Lin-15]</i>                                                                                     | 1S2B    |
| <b>AVA and A co-ablation</b> |                                                      |                               |                                                                                                                                                                              |         |

|                                                            |                                                               |                                          |                                                                                                                                                                      |           |
|------------------------------------------------------------|---------------------------------------------------------------|------------------------------------------|----------------------------------------------------------------------------------------------------------------------------------------------------------------------|-----------|
| ZM10344                                                    | <i>hpls371</i> ;<br><i>hpEx4114</i>                           | pJH2843<br>pJH4315<br>pJH4237            | <u>AVA/A miniSOG</u><br>[ <i>Punc-4- mito::miniSOG sl2 mCherry</i> ];<br>[ <i>Pf1p-18-LoxP stop LoxP mito::miniSOG</i><br><i>sl2 mCherry; Ptwk-40s-Cre</i> ]         | 2S2A      |
| ZM11234                                                    | <i>twk-40(hp834)</i> ;<br><i>hpls371</i> ;<br><i>hpEx4114</i> | pJH2843<br>pJH4315<br>pJH4237            | <i>twk-40(lf)</i> ;<br>[ <i>Punc-4-mito::miniSOG sl2 mCherry</i> ];<br>[ <i>Pf1p-18-LoxP stop LoxP mito::miniSOG</i><br><i>sl2 mCherry; Ptwk-40s-Cre</i> ]           | 2S2A      |
| <b>PVC ablation</b>                                        |                                                               |                                          |                                                                                                                                                                      |           |
| ZM7054                                                     | <i>hpls321</i>                                                | pJH2827                                  | <u>AVA, AVE, AVD, RIM, PVC mini SOG</u><br>[ <i>Pnmr-1-tomm-20::miniSOG sl2 Cherry</i> ]                                                                             | 3S1A      |
| <b>RIM ablation</b>                                        |                                                               |                                          |                                                                                                                                                                      |           |
| ZM7978                                                     | <i>hpls327</i>                                                | pJH2829                                  | <u>RIM miniSOG</u><br>[ <i>Pcex-1-tomm-20::miniSOG sl2 Cherry</i> ]                                                                                                  | 3S1A      |
| <b>AVA-specific TeTx and <i>cha-1</i> RNAi</b>             |                                                               |                                          |                                                                                                                                                                      |           |
| ZM10755                                                    | <i>hpls814</i>                                                | pJH4508<br>pJH4237                       | <u>AVA-specific TeTx</u><br>[ <i>Pf1p-18-LoxP Stop LoxP TeTx::cherry</i> ;<br><i>Ptwk-40s-Cre</i> ]                                                                  | 8A; 8SA-C |
| ZM11082                                                    | <i>twk-40 (hp834)</i> ;<br><i>hpls814</i>                     | pJH4508<br>pJH4237                       | <i>twk-40(lf)</i> ;<br>[ <i>Pf1p-18-LoxP Stop LoxP TeTx::cherry</i> ;<br><i>Ptwk-40s-Cre</i> ]                                                                       | 8A; 8SA-C |
| ZM11086                                                    | <i>hpEx4362</i>                                               | PCR<br>product                           | <u>AVA-specific <i>cha-1</i> RNAi</u><br>[ <i>Pf1p-18-cha-1(sense)</i> ; <i>Ptwk-40-cha-1</i><br>( <i>antisense</i> ); * <i>Pttx-3-GFP</i> ]                         | 8A, 8SA   |
| <b>AVA peptide secretion and synaptic vesicle analyses</b> |                                                               |                                          |                                                                                                                                                                      |           |
| ZM11039                                                    | <i>hpEx4351</i>                                               | pJH4677                                  | [ <i>Pnpr-4-ins-22::GFP</i> ]                                                                                                                                        | 7C        |
| ZM11078                                                    | <i>hpEx4351</i> ;<br><i>hpEx4364</i>                          | pJH4677<br>pJH4506                       | <u>with AVA-TeTx</u><br>[ <i>Pnpr-4-ins-22::GFP</i> ];<br>[ <i>Pnpr-4-TeTx</i> ]                                                                                     | 7C        |
| ZM11084                                                    | <i>hpEx4363</i>                                               | pJH4687                                  | [ <i>Pnpr-4-ins-22::pHluorin</i> ]                                                                                                                                   | 7B        |
| ZM11085                                                    | <i>hpEx4363</i> ;<br><i>hpls814</i>                           | pJH4687<br>pJH4508<br>pJH4237            | <u>with AVA-TeTx</u><br>[ <i>Pnpr-4-ins-22::pHluorin</i> ];<br>[ <i>Pf1p-18-LoxP Stop LoxP TeTx::cherry</i> ;<br><i>Ptwk-40s-Cre</i> ]                               | 7B        |
| ZM10040                                                    | <i>hpls721</i>                                                | pJH4169<br>pJH2673                       | <u>AVA-specific vesicle marker</u><br>[ <i>Prig-3 FRT stop FRT SNB-1::GFP</i> ;<br><i>Pnmr-1-FLP</i> ]                                                               | 7A        |
| ZM10786                                                    | <i>hpls721</i> ;<br><br><i>hpls811</i>                        | pJH4169<br>pJH2673<br>pJH4508<br>pJH4237 | <u>with AVA-TeTx</u><br>[ <i>Prig-3 FRT stop FRT SNB-1::GFP</i> ;<br><i>Pnmr-1-FLP</i> ];<br>[ <i>Pf1p-18-LoxP Stop LoxP TeTx::cherry</i> ;<br><i>Ptwk-40s-Cre</i> ] | 7A        |

|                                              |                                                             |                                          |                                                                                                                                                       |                 |
|----------------------------------------------|-------------------------------------------------------------|------------------------------------------|-------------------------------------------------------------------------------------------------------------------------------------------------------|-----------------|
| <b>AVA optogenetic (Chrimson) activation</b> |                                                             |                                          |                                                                                                                                                       |                 |
| ZM10206                                      | <i>hpls758</i>                                              | pJH4253<br>pJH4237                       | <i>[Prig-3-LoxP Stop LoxP Chrimson::Cherry; Ptwk-40s-Cre]</i>                                                                                         | 6B              |
| ZM11151                                      | <i>hpls758;</i><br><i>hpls814</i>                           | pJH4253<br>pJH4237<br>pJH4508<br>pJH4237 | <u>with AVA-TeTx</u><br><i>[Prig-3-LoxP Stop LoxP Chrimson::Cherry; Ptwk-40s-Cre];</i><br><i>[Pflp-18-LoxP Stop LoxP TeTx::wCherry; Ptwk-40s-Cre]</i> | 8B              |
| <b>AVA HisCl chemogenetic inactivation</b>   |                                                             |                                          |                                                                                                                                                       |                 |
| ZM9354                                       | <i>hpls636</i>                                              | Ref. <sup>32</sup>                       | <i>[Prig-3::HisCl1::SL2::mCherry]</i>                                                                                                                 | 6C, D           |
| ZM11286                                      | <i>hpls636;</i><br><i>hpEx4479</i>                          | Ref. <sup>32</sup><br>pJH4783            | <i>[Prig-3::HisCl1::SL2::mCherry];</i><br><i>[Pnpr-4-SNB-1::pHluorin]</i>                                                                             | 6E              |
| ZM11287                                      | <i>hpEx4479</i>                                             | pJH4783                                  | <i>[Pnpr-4-SNB-1::pHluorin]</i>                                                                                                                       | 6F              |
| ZM11284                                      | <i>twk-40(bln336);</i><br><i>hpEx4479</i>                   | pJH4783                                  | <i>twk-40(gf);</i><br><i>[Pnpr-4-snb-1::pHluorin]</i>                                                                                                 | 6F              |
| ZM11285                                      | <i>twk-40 (hp834);</i><br><i>hpEx4479</i>                   | pJH4783                                  | <i>twk-40(lf);</i><br><i>[Pnpr-4-snb-1::pHluorin]</i>                                                                                                 | 6F              |
| <b>AVA optogenetic (GtACR2) inactivation</b> |                                                             |                                          |                                                                                                                                                       |                 |
| ZM10806                                      | <i>hpls824</i>                                              | pJH4562<br>pJH4237                       | <i>[Pflp-18-LoxPStopLoxP gtACR2::wCherry; Ptwk-40s-Cre]</i>                                                                                           | 2S2B            |
| ZM10538                                      | <i>hpls774;</i><br><i>hpEx4081</i>                          | pJH4293<br>pJH4217<br>pJH4237            | <u>with AVA/AVB co-calcium imaging</u><br><i>[Ptwk-40s-GCaMP6s::mNeptune]</i><br><i>[Prig-3 LoxP Stop LoxPgACR2::wCherry; Ptwk-40s-Cre]</i>           | 4B, D<br>4SB, D |
| <b>AVB optogenetic (GtACR2) inactivation</b> |                                                             |                                          |                                                                                                                                                       |                 |
| ZM10942                                      | <i>hpls774;</i><br><i>hpEx4292</i>                          | pJH4293<br>pJH4609<br>pJH4237            | <u>with AVA/AVB co-calcium imaging</u><br><i>[Ptwk-40s-GCaMP6s::mNeptune];</i><br><i>[Ppdf-1 LoxP eBFP LoxP gtACR2::Cherry; Ptwk-40s-Cre]</i>         | 4A, C<br>4SA, C |
| <b>AVB ablation</b>                          |                                                             |                                          |                                                                                                                                                       |                 |
| ZM7297                                       | <i>hpls331</i>                                              | pJH2890                                  | <u>AVB miniSOG</u><br><i>[Plgc-55-mito::miniSOG UrSL wCherry]</i>                                                                                     | 3A; 3S1A, B     |
| ZM10327                                      | <i>twk-40(bln282);</i><br><i>hpls331;</i><br><i>hpls727</i> | pJH2890<br>pJH3830                       | <u>with AVA-specific TWK-40(lf)</u><br><i>twk-40::TagRFP::ZF;</i><br><i>[Plgc-55-mito::miniSOG UrSL wCherry];</i><br><i>[Prig-3-zif-1 sl2 RFP]</i>    | 3B              |
| ZM10683                                      | <i>hpls331;</i><br><i>hpls768</i>                           | pJH2890<br>pJH4316<br>pJH4237            | <u>with AVA-specific TWK-40(gf)</u><br><i>[Plgc-55-mito::miniSOG UrSL wCherry];</i><br><i>[Pflp-18-LoxP twk-40(gf)::GFP LoxP; Ptwk-40-Cre]</i>        | 3S1B            |

|                                                                                                                                                  |                                                                |                               |                                                                                                                                                             |                       |
|--------------------------------------------------------------------------------------------------------------------------------------------------|----------------------------------------------------------------|-------------------------------|-------------------------------------------------------------------------------------------------------------------------------------------------------------|-----------------------|
| ZM11173                                                                                                                                          | <i>hpls331</i> ;<br><i>hpls758</i>                             | pJH2890<br>pJH4253<br>pJH4237 | with AVA-specific Chrimson<br>[Plgc-55-mito::miniSOG UrSL wCherry];<br>[Prig-3-LoxPStopLoxP Chrimson::Cherry;<br>Ptwk-40s-Cre]                              | 6SA                   |
| ZM11172                                                                                                                                          | <i>hpls331</i> ;<br><i>hpls824</i>                             | pJH2890<br>pJH4562<br>pJH4237 | with AVA-specific GtACR2<br>[Plgc-55-mito::miniSOG UrSL wCherry];<br>[Pflp-18-LoxP Stop LoxP gtACR2::Cherry;<br>Ptwk-40s-Cre]                               | 3S1C                  |
| <b>AVA-AVB co-calcium imaging</b>                                                                                                                |                                                                |                               |                                                                                                                                                             |                       |
| ZM10767                                                                                                                                          | <i>hpls819</i>                                                 | pJH4542                       | [Ptwk-40s-GCaMP T2A nls::mNeptune]                                                                                                                          | 3D;<br>5B-D; 5SA-D    |
| ZM11014                                                                                                                                          | <i>twk-40(bln282)</i> ;<br><i>hpls819</i> ;<br><i>hpEx3904</i> | pJH4542<br>pJH4018<br>pJH2673 | with AVA-specific TWK-40(lf)<br><i>twk-40::TagRFP::ZF</i> ;<br>[Ptwk-40s-GCaMP T2A nls::mNeptune];<br>[Prig-3 FRT zif-1 sl2 eBFP FRT;<br>Pnmr-1-FLP; *HygR] | 3D;<br>5B-D; 5SA, B-D |
| ZM11015                                                                                                                                          | <i>hpls819</i> ;<br><i>hpls768</i>                             | pJH4542<br>pJH4316<br>pJH4237 | with AVA-specific TWK-40(gf)<br>[Ptwk-40s-GCaMP T2A nls::mNeptune];<br>[Pflp-18-LoxP <i>twk-40(gf)::GFP</i> LoxP;<br>Ptwk-40s-Cre]                          | 3D;<br>5E, F; 5SA, D  |
| ZM11034                                                                                                                                          | <i>hpls819</i> ;<br><i>hpls810</i>                             | pJH4542<br>pJH4508<br>pJH4237 | AVA-specific TeTx<br>[Ptwk-40s-GCaMP T2A nls::mNeptune];<br>[Pflp-18-LoxP TeTx::wCherry LoxP;<br>Ptwk-40s-Cre]                                              | 8C; 8SA-C             |
| Notes: [ ] integrated or extra-transgenic arrays; * Co-injection markers; Stop: stop codon or termination sequence in the <i>let-858</i> 3' UTR. |                                                                |                               |                                                                                                                                                             |                       |

## Methods

### Constructs and strains

See Supplemental Table for a full list of constructs and stains used in this study. Primers and sequences are available upon request. All *C. elegans* strains were cultured on the standard Nematode Growth Medium (NGM) plates seeded with OP50 and maintained at 22.5 °C unless specified. The wild-type animal refers to the Bristol N2 strain or animals. The control animal refers to a transgenic line without explicitly introduced genetic mutations. L4 stage hermaphrodites were used for the experiments unless specified otherwise.

### Isolation, cloning, and generation of *twk-40* mutants

The first loss of function allele of *twk-40*(*hp733*) was isolated in a genetic screen based on altered behavior. *hp733* was isolated with exaggerated amplitude in both forward and reverse movement as well as a tendency to form a backward coil. *hp733* was mapped to the left arm of chromosome III past the SNP marker W06F12 at ~21. Whole genome sequencing was performed, and a single missense mutation (E36K) was identified in *twk-40*. Fosmids and plasmids containing wild-type *twk-40* coding sequence fully rescued the behavioral change in *hp733*. Subsequently, we generated another loss of function allele in *twk-40*(*hp834*) using CRISPR gene editing. *hp834* has a 7bp deletion in between exon 1 and the following intron (at base 3378-3384 (GTTCGAG) of T28A8.1b), resulting in a frame-shift mutation of *twk-40* that expresses only the first twelve amino acids of the channel. *hp834* displayed similar but stronger behavioral defects than *hp733* and was easy to be genotyped. We subsequently used *hp834* as the canonical *lf* allele for all experiments shown in this study.

Gain of function allele *bln336*, *L181N* was engineered by CRISPR/Cas9 editing by mutating the 4298-4299 base of T28A8.1b from CT to AA<sup>49</sup>. TWK-40 degradation was generated by a repurposed E3 ligase degradation system<sup>51</sup>. *bln282* (*twk-40::TagRFP::ZF*) was generated by CRISPR/Cas9 genome editing to insert an in frame TagRFP::ZF fusion at base pair 5785 at T28A8.1b (*twk-40*)<sup>101</sup>.

AVA-specific TWK-40(*lf*) was generated by expressing ZIF in AVA using the *rig-3* promoter or *nmr-1/rig-3*-promoter combination (*Prig-3 FRT zif-1 sl2 eBFP FRT; Pnmr-1-FLP*) via the FRT-FLP recombination system in *bln282* (*twk-40::TagRFP::ZF*) background. AVA-specific TWK-40(*gf*) was generated by expressing TWK-40(L181N)::GFP in AVA by *flp-18/twk-40*-promoter combination (*Pflp-18-LoxP stop LoxP twk-40(gf)::GFP; Ptwk-40-cre*) or via the Cre-LoxP recombination system in the N2 background, or *rig-3/nmr-1* promoter combination (*Prig-3-LoxP stop LoxP twk-40(gf)::GFP; Pnmr-1-Cre*) via the FRT-FLP recombination system in N2 background. AVA-specific TWK-40 rescue was generated by expressing TWK-40(WT)::GFP in AVA by *rig-3/nmr-1*-promoter combination (*Prig-3 FRT Stop FRT twk-40::GFP; Pnmr-1-FLP*) via the Cre-LoxP recombination system in *twk-40(lf)* background.



## Spontaneous locomotion analyses

A single L4 animal was collected and transferred to an NGM plate with a thin layer of evenly spread OP50. After 30 seconds, it was recorded on a tracking microscope using an in-house developed ImageJ plugin<sup>26</sup>. A 3-minute movie of the animals was recorded at 10 fps. At least 10 animals for each genotype were recorded on the same day using the same condition. The movies were analyzed as previously described<sup>26,58</sup>. Briefly, the animal contour was divided into 33 segments by its centerline along the longitudinal axis. Body curvature in radian between adjacent body segment segments (5-32) was calculated. Velocity was calculated by the displacement of the centroid.

## Electrophysiology

*Exogenous TWK-40 channel whole-cell patch recording in HEK293 cells:* HEK293 cells were cultured in the DMEM medium with 10% fetal bovine serum, 1% double antibody at 5% CO<sub>2</sub>, and 37°C. TWK-40 expression construct was generated by RT-PCR amplification of cDNA b isoform and inserting into the BstXI and NheI sites of the pCDNA3.1 vector. After 24 hours of transfection of the plasmid with the liposome ExFect2000 (Vazyme, China), cells were patched using 4-6 MΩ-resistant borosilicate pipettes (1B100F-4, World Precision Instruments, USA). Pipettes were pulled by micropipette puller P-1000 (Sutter, USA), and fire-polished by microforge MF-830 (Narishige, Japan). Membrane currents and I-V curve were recorded and plotted in the whole-cell configuration by pulse software with the EPC-9 amplifier (HEKA, Germany) and processed with the Igor Pro (WaveMetrics, USA) and Clampfit 10 software (Axon Instruments, Molecular Devices, USA). I-V curve was recorded at a holding potential from -80 mV to 80 mV with 20 mV step voltages. Data were digitized at 10-20 kHz and filtered at 2.6 kHz. The pipette solution contained (in mM): KCl 140; MgCl<sub>2</sub> 1; EGTA 10; HEPES 10; Na<sub>2</sub>ATP 4; pH 7.3 with KOH, ~300 mOsm. The bath solution consisted of (in mM): NaCl 140; KCl 3.6; CaCl<sub>2</sub> 2.5; MgCl<sub>2</sub> 1; pH 7.3 with NaOH, ~310 mOsm. For low intracellular K<sup>+</sup> recording, the pipette solution contained (in mM): KCl 14; CsCl 126; MgCl<sub>2</sub> 1; EGTA 10; HEPES 10; Na<sub>2</sub>ATP 4; pH 7.3 with CsOH, ~300 mOsm. Chemicals were obtained from Sigma unless stated otherwise. Experiments were performed at room temperatures (20-22°C).

*in situ whole-cell patch clamp of C. elegans neurons AVA and AVB:* Premotor interneuron whole-cell patch clamp recording was performed using a strain with fluorescent labeling of AVA and AVB neurons, a configuration as previously described<sup>26,39</sup>, which was modified from previous reports<sup>40,44,110</sup>. Briefly, 1- or 2-day-old hermaphrodite adults were glued (Histoacryl Blue, Braun) to a sylgard-coated cover glass covered with bath solution (Sylgard 184, Dowcorning) under a stereoscopic microscope (M50, Leica). After clearing the viscera by suction through a glass pipette, the cuticle flap was turned and gently glued down using WORMGLU (GluStitch Inc.) to expose the soma of AVA and AVB neurons. Neurons were patched using ~20 MΩ-resistant borosilicate pipettes (1B100F-4; World Precision Instruments). Pipettes were pulled by micropipette puller P-1000 (Sutter) and fire-polished by microforge MF-830 (Narishige). Membrane currents and potentials were collected in the whole-cell



configuration by pulse software with an EPC9 amplifier (HEKA, Germany). Data were digitized at 10 kHz and filtered at 2.6 kHz. The recording pipette solution consisted of: KCl 25 mM; K-Gluconate 115 mM; CaCl<sub>2</sub> 0.1 mM; MgCl<sub>2</sub> 5 mM; BAPTA 1 mM; HEPES 10 mM; Na<sub>2</sub>ATP 5 mM; Na<sub>2</sub>GTP 0.5 mM; cAMP 0.5 mM; cGMP 0.5 mM, pH 7.2 with KOH, ~320 mOsm. cGMP and cAMP were included to increase the longevity of the preparation<sup>39,111</sup>. The bath solution consisted of KCl 5 mM; NaCl 150 mM; CaCl<sub>2</sub> 5 mM; MgCl<sub>2</sub> 1 mM; glucose 10 mM; sucrose 5 mM; HEPES 15 mM, pH 7.3 with NaOH, ~330 mOsm. The K<sup>+</sup> current was recorded at a holding potential from –60 mV and followed a ramp voltage stimulation from –90 mV to 90 mV. The membrane voltage recording was performed at 0 pA for at least 30 seconds. The background leak currents were recorded at –60 mV. Healthy preparations were selected based on the following criteria: whole-cell capacitance (1-1.5 pF), and steady-state leak current (–20-0 pA at –60mV). Experiments were performed at room temperatures (20-22°C).

### Cell ablation by MiniSOG

Strains expressing miniSOG<sup>112</sup> in AVB, RIM, AVA, A, or AVA/A were used for ablation by exposing L2 larvae to blue LED light as described in previous studies<sup>25,58,113</sup>. Briefly, cells expressing miniSOG were co-labeled with RFP. animals were treated with 30-40 min LED blue light using a homemade device and allowed to recover for 1 day. L4 animals were recorded for behavioral analyses. For PVC ablation, L2-stage transgenic animals that express miniSOG in multiple premotor interneurons, including but not exclusive to PVC, were anesthetized by sodium azide and mounted on a 2 percent agarose pad with a coverslip. The tail region was exposed to a blue laser for 30 min and animals were allowed to recover for 2 days before recording at the L4 stage. Only healthy animals were recorded and analyzed. The ablation efficiency was confirmed by the disappearance or distortion of the soma fluorescence and fragmentation of neurites.

### Optogenetic stimulation for behavioral and calcium imaging

*Strains:* Strains that express AVA-specific Chrimson or GtACR2 strains were used for AVA-specific stimulation and inhibition, respectively. The specificity of AVA-specific GtACR2 was verified by AVA ablation using *Pnmr-1-miniSOG*. The AVA-ablated animal no longer exhibited light-induced inhibition during forward and backward movement. Transgenic animals were cultured on ATR plates in darkness for two generations. The second-generation L4-stage animals were analyzed for behavior and calcium activities. Controls were animals of the same genotypes, cultured and treated similarly, except with no ATR included on culture plates.

*Behaviors upon stimulation:* an individual L4-stage animal was transferred to an imaging plate with a thin layer of evenly spread OP50. After 30 seconds, the movement of the animal was tracked during multiple stimulation cycles: 10s pre-stimulation, 10s stimulation, 10s post-stimulation; or, 30 seconds pre-stimulation, 30 seconds stimulation, and 30 seconds post-stimulation. 488nm and 574nm LED light stimulation were applied to inhibit and activate AVA, by activating GtACR2 and Chrimson, respectively.

*Constitutive, minimal Chrimson-mediated AVA activation:* ATR-supplemented NGM plates were seeded with regular OP50 supplemented with ATR (1ml OP50/0.5µl 50µM ATR). Animals were cultured on ATR plates for at least 1 day for behavior recording. Before recording, animals were conditioned with 544nm green LED light for up to 5min (Zeiss V16), followed by recording at 595nm yellow light (Thorlabs) at low intensity (4 out of 63 A.U.).

*Minimal GtACR2-mediated AVA inactivation:* Animals were cultured on ATR-supplemented NGM plates for at least 1 day for behavior recording. During stimulation, animals were exposed to 470nm blue LED light at low intensity (4 out of 63 A.U.).

*GtACR2-mediated AVB inactivation:* L4 stage AVB-specific GtACR2 animals were incubated on plates with or without -ATR or +ATR (1ml OP50 /5µl 50µM ATR) plates for 2 hours and then subjected to behavior recording with a constant 470nm LED exposure at low intensity (4 out of 63 A.U.) for 800 seconds.

*Simultaneous calcium recording and optogenetic stimulation:* The experiment process was previously described<sup>113</sup>. Briefly, L4 stage animals carrying AVA and AVB calcium reporters and either AVA-specific GtACR2 or AVB-specific GtACR2 were incubated on -ATR or +ATR plates for 2 hours. They were immobilized on dry agarose pads in M9 buffer and subjected to full spectrum light illumination for simultaneous calcium imaging and GtACR2-mediated inhibition at 10 fps or 20 pfs for 6-20 seconds.

## **Behavioral analyses upon chemogenetic manipulation**

Animals of the L4 stage carrying an extrachromosomal array for *Prig-3* HisCl::mCherry<sup>32</sup> were incubated on 0mM, 2mM, 5mM, or 10mM histamine plates with OP50 for 1 hour before being individually placed on the behavioral imaging plates for spontaneous behavior recording and quantification.

## **Immunofluorescent staining and imaging**

Mixed stages of animals with endogenously tagged *twk-40* (*twk-40*::TagRFP::ZF), with or without the plasma marker (*Prgef-1*-GPI::YFP), and animals with an integrated *twk-40*::GFP fosmid were fixed in 2% paraformaldehyde at 4°C for 1 hour and processed as previously described<sup>114</sup>. Primary antibodies against TagRFP (Thermo Fisher Scientific, R10367, rabbit) and/or GFP (Roche, mouse) were used at 1:500 and 1:200 dilution, respectively. Secondary antibodies of goat-anti-rabbit (Alexa Fluor 488) and/or goat anti-mouse (Alexa Fluor 594) were used at 1:5000 dilution. L4 larvae and adults were imaged with a Nikon spinning disk confocal microscope with a 63x objective and reconstructed by maximum intensity projection. Single layers of acquired images from animals co-expressing TWK-40::TagRFP::ZF and GPI::YFP were examined for subcellular colocalization using an ImageJ plugin (JACoP).

## **Live fluorescence microscopy of GFP and pHluorin**

Live L4 larvae were immobilized on dry agarose pads in a small drop of M9 buffer. Fluorescence signals were captured using Nikon Eclipse 90i confocal microscope and Nikon Eclipse T12 with

Yokogawa CSU-X1 spinning disk field scanning confocal system. For pHluorin imaging, all images were acquired within 10min after dry pad preparation. All fluorescent images were analyzed by the in-house developed puncta analyzer<sup>115</sup> or ImageJ intensity analyzer.

### Calcium imaging of premotor interneurons in moving animals

AVA (L or R) or AVB (L or R) single neuron imaging was performed in L4 larvae as previously described<sup>73</sup>. Briefly, an individual transgenic animal was placed on a 2.5 percent agarose pad to ensure its slow movement. The animal was allowed to recover for 3min and then recorded using Zeiss Axioskop 2 Plus upright microscope with 40x objective or Nikon spinning disc confocal with 20x objective in the wide-field mode. Signal extraction and calcium activity (GCaMP/RFP ratio unless stated otherwise) were carried out as previously described<sup>113</sup>.

For AVA (L or R) and AVB (L or R) co-imaging, an individual transgenic L4 stage animal expressing the GCaMP6s calcium sensor in AVA and AVB (*hpls819*) was mounted on a 2 percent NGM gel pad with ~1μl M9 buffer so that it could move under a coverslip. Mounted animals were allowed to recover for 3min on the pad before recording. The recording was performed using a 20x objective on Nikon spinning disk confocal microscope. Animals were centered in the field of view by manual tracking. AVB soma was manually kept in focus at the RFP channel during recording. The initiation of each epoch of reversal to forward locomotion transition was defined by the alignment between velocity and AVA-AVB calcium activity (GCaMP intensity) using in-house-developed MATLAB scripts<sup>113</sup>.

### Cell-specific perturbation of neurotransmission

AVA-specific TeTx was achieved by the Cre-LoxP recombination system. AVA-specific *cha-1* RNAi was generated using the combination of *Pflp-18* and *Ptwk-40* promoter combination to drive the sense and anti-sense strands of *cha-1* genomic DNA, respectively. The following primers and templates were used: (A) *Pflp-18*: OZM6199 (GATGGATACGCTAACAACTTGG) and OZM6200 (CTACAACGGCAGCGTATTTCGATCCCGTCTAAC-CCTGAAA) amplified from pJH4631. (B) *cha-1* exon: OZM6201 (GAATACGCTGCCGTTGTAG) and OZM6240 (GTCGAGTGCTCTATGCACAACC), amplified from N2 genomic DNA. (C) *Ptwk-40s*: OZM6199 (GATGGATACGCTAACAACTTGG) and OZM6253 (GTATGATGCGACTATTCAGCTGT-GAATATTCATCACTCGATATTCCA) amplified from pJH4608. (D) *cha-1* exon: OZM6201 (GAATACGCTGCCGTTGTAG) and OZM6202 (CAGCTGAATAGTCGCATCATAC), amplified from N2 genomic DNA. PCR fusion was performed to obtain sense and anti-sense *cha-1* by following primers: *Pflp-18-cha-1*(sense): OZM6203 (AGCTTAGCCGGAATAGGGTCA) and OZM6202 (CAGCTGAATAGTCGCATCATAC), amplified from mixed PCR product (A+B). *Ptwk-40-cha-1*(antisense): OZM3543 (AATGCGGCCGCTCTAATCACTATCACGT GGGATCTGGATAA); OZM6254 (CGTAG-GCCAGAAAGCCTCAC) from mixed PCR product (C+D). Mixed PCR products were injected into N2 animals.

## Modeling

Our approach is to find the simplest phenomenological model (i.e. a non-mechanistic model with as few free parameters as possible) that explains the observed calcium activity patterns of AVA and AVB, as opposed to a detailed, more biologically realistic model. A more realistic model will have several parameters, the estimation of which will require assumptions or experiments to fix.

We first note that our experiments suggest that the communication between AVB and AVA is largely unidirectional, with AVA affecting AVB's activity and very little effect in the opposite direction. Consequently, we start with the following equation for the calcium activity of AVB,

$x_{AVB}$

$$\frac{dx_{AVB}}{dt} = -\frac{1}{\tau_{AVB}} \cdot x_{AVB} + \sigma(w_{AVA} \cdot x_{AVA} + \sum_i w_i z_i + c)$$

Where  $x_{AVA}$  is the calcium activity of AVA,  $z_i$  is the activity of all other input neurons of AVB,  $w_i$  is the synaptic weight of each input,  $c$  is the bias input, and  $\sigma$  denotes the activation function for the synapse. Typically, the activation function is a sigmoidal function. However, to simplify the model we restrict our attention to the linear case, where  $\sigma$  is simply the identity function,  $\sigma(x) = x$ .

Next, we make a key simplification to the model above based on our experiments. Our results show that AVA forms the dominant input on to AVB. Specifically, AVA-*twk-40(gf)* animals cannot sustain their forward motion (Fig. 2B) and AVB's calcium is significantly reduced in this background (Fig. 3D). This suggests that we can ignore the input from other neurons in the model. Thus, we set  $w_i = 0$  for all neurons other than AVA. Giving us the following leaky-integrator differential equation.

$$\frac{1}{w_{AVA}} \frac{dx_{AVB}}{dt} = -\frac{1}{\tau_{AVB} \cdot w_{AVA}} \cdot x_{AVB} + x_{AVA} + c$$

As a final simplification, we assume that the direct input from AVA is faster than the kinetics of the calcium sensor, such that any activity in AVA is immediately reflected in AVB. Thus, we consider the limit  $\frac{1}{w_{AVA}} \rightarrow 0$ . Giving us the final simplified model as,

$$x_{AVB} = a \cdot x_{AVA} + c$$

Where  $a = \frac{1}{\tau_{AVB} \cdot w_{AVA}}$  is a dimensionless multiplier. As seen in Fig. 5B, this model with  $a < 0$  (black dotted line) can predict the anticorrelated activity pattern between AVA and AVB during a reversal, but is unable to explain AVB's activity after the reversal.

To capture the slow decay of AVB, we add an additional slower input from AVA to AVB (as shown in the schematic in Fig. 5A). Giving us the following system of equations with just three free parameters.

$$x_{AVB} = a \cdot x_{AVA} + b \cdot y$$

$$\frac{dy}{dt} = -\frac{1}{\tau} \cdot y + x_{AVA}$$

Where,  $a$  and  $b$  are the coefficients for the fast and slow inputs respectively, and  $\tau$  is the integration time-constant for the slow component of AVA. To fit the parameters from calcium imaging data, we used *procest* function from MATLAB's system identification toolbox, which estimates the transfer function for the equation above. Laplace transforming the system of equations above results in the following transfer function,

$$\frac{X_{AVB}(s)}{X_{AVA}(s)} = \left[ \frac{(a + b \cdot \tau) + (a \cdot \tau) \cdot s}{1 + \tau \cdot s} \right]$$

which has one zero and one pole. The number of zeros and poles form the input to *procest*, along with the calcium traces of AVB calcium (set as output signal) and AVA calcium (set as the input signal). To get a distribution over model parameters and performances, we do a cross-validation procedure where the parameters are estimated from a single recording and then tested on the remaining recordings. The model R-squared showed in Fig 5C shows the distribution from the models thus estimated.

The same setup was used to model the velocity from AVA's calcium activity (Fig 5G) using *procest* (i.e. a single pole, single zero transfer function), with AVA's activity being set as the input signal and velocity forming the output signal.

## Statistical analyses

**Electrophysiological analyses:** The cumulative distributions for the membrane voltage of AVA and AVB were calculated using MATLAB's *ecdf* function. To compute the joint histogram (Fig. 1S1, Fig. 3S2), we first computed the derivative of membrane potential with a finite difference (preceded by smoothing with a Gaussian kernel) and then used MATLAB's bivariate histogram *histogram2* to perform the histogram estimation. For HEK293 cell recording, the Mann-Whitney U tests were used.

**Behavior and fluorescent analysis:** Mann-Whitney U tests were used to quantify data of box and whisker plots unless stated otherwise.

**Calcium imaging:** Error bars in Fig. 4 and Fig. 4S were computed as a 95% confidence interval of the mean bootstrapped over 1000 resamples.

1134 P value less than 0.05 is considered to be statistically significant. \*:  $P < 0.05$ , \*\*:  $P < 0.01$ , \*\*\*:  $P$   
1135  $< 0.001$ .

## 1136 **Conflict of interests**

1137 The authors declare no conflict of interest.

## 1138 **Author contributions**

1139 Conception and supervision: MZ; Design of experiments, modeling, and analyses: JM, TA, WH,  
1140 SG, TB, MZ; Data collection: JM, TA, BY, WH, ZY, SM, SG; Reagents and scripts: SM, ZW, YZ, TA,  
1141 QW; MJ, TA, and MZ wrote the manuscript; all authors edited or approved the manuscript.

## 1142 **Acknowledgments**

1143 We thank Ying Wang and Yan Li for technical support; comments from and discussions with Ben  
1144 Mulcahy, Miriam Goodman, and Cori Bargmann. This work was supported by the Canadian  
1145 Institute of Health Research FDN154274 and the Natural Sciences and Engineering Research  
1146 Council of Canada RGPIN2017-06738 (MZ), the key International (Regional) Joint Research  
1147 Project (32020103007) (SG and QW), the National Natural Science Foundation of China  
1148 (31871069) (SG) and the European Research Council (337702-Kelegans) (TB).



## References

1. Carreira-Rosario, A. *et al.* MDN brain descending neurons coordinately activate backward and inhibit forward locomotion. *Elife* **7**, (2018).
2. Briggman, K. L. & Kristan, W. B. Imaging dedicated and multifunctional neural circuits generating distinct behaviors. *J. Neurosci.* **26**, 10925–10933 (2006).
3. Mazzucato, L. Neural mechanisms underlying the temporal organization of naturalistic animal behavior. *Elife* **11**, (2022).
4. Briggman, K. L. & Kristan, W. B. Multifunctional pattern-generating circuits. *Annual Review of Neuroscience* **31**, 271–294 (2008).
5. Ramirez, J. M. & Pearson, K. G. Generation of motor patterns for walking and flight in motoneurons supplying bifunctional muscles in the locust. *J. Neurobiol.* **19**, 257–282 (1988).
6. Roberts, W. M. *et al.* A stochastic neuronal model predicts random search behaviors at multiple spatial scales in *C. elegans*. *Elife* **5**, (2016).
7. Berkowitz, A. Both shared and specialized spinal circuitry for scratching and swimming in turtles. *J. Comp. Physiol. A. Neuroethol. Sens. Neural. Behav. Physiol.* **188**, 225–234 (2002).
8. Gaudry, Q., Ruiz, N., Huang, T., Kristan, W. B. & Kristan, W. B. Behavioral choice across leech species: chacun à son goût. *J. Exp. Biol.* **213**, 1356–1365 (2010).
9. Koyama, M. *et al.* A circuit motif in the zebrafish hindbrain for a two alternative behavioral choice to turn left or right. *Elife* **5**, (2016).
10. Popescu, I. R. & Frost, W. N. *Highly Dissimilar Behaviors Mediated by a Multifunctional Network in the Marine Mollusk Tritonia diomedea*. *Soc Neuroscience* (2002).
11. Soffe, S. R. Two distinct rhythmic motor patterns are driven by common premotor and motor neurons in a simple vertebrate spinal cord. *J. Neurosci.* **13**, 4456–4469 (1993).
12. Itti, L. & Koch, C. Computational modelling of visual attention. *Nat. Rev. Neurosci.* **2**, 194–203 (2001).
13. Goodhill, G. J. Contributions of theoretical modeling to the understanding of neural map development. *Neuron* **56**, 301–311 (2007).
14. Kohonen, T. Self-organized formation of topologically correct feature maps. *Biol. Cybern.* **43**, 59–69 (1982).
15. Lynch MIT, N., Musco, C. & Parter, M. Winner-Take-All Computation in Spiking Neural Networks. (2019). doi:10.48550/arxiv.1904.12591
16. Chen, Y. Mechanisms of winner-take-all and group selection in neuronal spiking networks. *Front. Comput. Neurosci.* **11**, 20 (2017).
17. Szigeti, B., Deogade, A. & Webb, B. Searching for motifs in the behaviour of larval *Drosophila melanogaster* and *Caenorhabditis elegans* reveals continuity between behavioural states. *J. R. Soc. Interface* **12**, (2015).
18. Stephens, G. J., Johnson-Kerner, B., Bialek, W. & Ryu, W. S. Dimensionality and dynamics in the behavior of *C. elegans*. *PLoS Comput. Biol.* **4**, (2008).
19. Gomez-Marin, A., Stephens, G. J. & Brown, A. E. X. Hierarchical compression of *Caenorhabditis elegans* locomotion reveals phenotypic differences in the organization of behaviour. *J. R. Soc. Interface* **13**, (2016).

- 1192 20. Ahamed, T., Costa, A. C. & Stephens, G. J. Capturing the continuous complexity of  
1193 behaviour in *Caenorhabditis elegans*. *Nat. Phys.* **17**, 275–283 (2021).
- 1194 21. Lindén, H., Petersen, P. C., Vestergaard, M. & Berg, R. W. Movement is governed by  
1195 rotational neural dynamics in spinal motor networks. *Nat.* 2022 6107932 **610**, 526–531  
1196 (2022).
- 1197 22. Croll, N. A. Components and patterns in the behaviour of the nematode *Caenorhabditis*  
1198 *elegans*. *J. Zool.* **176**, 159–176 (1975).
- 1199 23. White, J., Southgate, E. & Thomson, J. The structure of the nervous system of the  
1200 nematode *Caenorhabditis elegans*. *Trans R Soc L. B Biol ...* (1986).
- 1201 24. Chen, B. L., Hall, D. H. & Chklovskii, D. B. Wiring optimization can relate neuronal  
1202 structure and function. *Proc. Natl. Acad. Sci. U. S. A.* **103**, 4723–4728 (2006).
- 1203 25. Gao, S. *et al.* Excitatory motor neurons are local oscillators for backward locomotion.  
1204 *Elife* **7**, (2018).
- 1205 26. Kawano, T. *et al.* An imbalancing act: Gap junctions reduce the backward motor circuit  
1206 activity to bias *C. elegans* for forward locomotion. *Neuron* **72**, 572–586 (2011).
- 1207 27. Xu, T. *et al.* Descending pathway facilitates undulatory wave propagation in  
1208 *Caenorhabditis elegans* through gap junctions. *Proc. Natl. Acad. Sci. U. S. A.* **115**, E4493–  
1209 E4502 (2018).
- 1210 28. Fang-Yen, C., Alkema, M. J. & Samuel, A. D. T. Illuminating neural circuits and behaviour  
1211 in *Caenorhabditis elegans* with optogenetics. *Philos. Trans. R. Soc. B Biol. Sci.* **370**,  
1212 20140212 (2015).
- 1213 29. Chalfie, M. *et al.* The neural circuit for touch sensitivity in *Caenorhabditis elegans*. *J.*  
1214 *Neurosci.* **5**, 956–964 (1985).
- 1215 30. Meng, J. Molecular , Cellular and Circuit Mechanisms that underlie a Two-pore Potassium  
1216 C channel ' s Regulation of Membrane Potential , Synaptic Activity and Locomotion  
1217 Molecular , Cellular and Circuit Mechanisms that underlie a Two-pore Potassium C  
1218 channel ' s Reg. (University of Toronto, 2022).
- 1219 31. Rodgers, J. B. & Ryu, W. S. Targeted thermal stimulation and high-content phenotyping  
1220 reveal that the *C. elegans* escape response integrates current behavioral state and past  
1221 experience. *PLoS One* **15**, (2020).
- 1222 32. Pokala, N., Liu, Q., Gordus, A. & Bargmann, C. I. Inducible and titratable silencing of  
1223 *Caenorhabditis elegans* neurons in vivo with histamine-gated chloride channels. *Proc.*  
1224 *Natl. Acad. Sci.* **111**, 2770–2775 (2014).
- 1225 33. Faumont, S. *et al.* An Image-Free Opto-Mechanical System for Creating Virtual  
1226 Environments and Imaging Neuronal Activity in Freely Moving *Caenorhabditis elegans*.  
1227 *PLoS One* **6**, e24666 (2011).
- 1228 34. Husson, S. J., Gottschalk, A. & Leifer, A. M. Optogenetic manipulation of neural activity in  
1229 *C. elegans*: From synapse to circuits and behaviour. *Biology of the Cell* **105**, 235–250  
1230 (2013).
- 1231 35. Schmitt, C., Schultheis, C., Husson, S. & Liewald, J. Specific expression of  
1232 channelrhodopsin-2 in single neurons of *Caenorhabditis elegans*. *PLoS One* (2012).
- 1233 36. Gao, S. *et al.* The NCA sodium leak channel is required for persistent motor circuit activity  
1234 that sustains locomotion. *Nat. Commun.* **6**, 6323 (2015).
- 1235 37. Goodman, M. B., Hall, D. H., Avery, L. & Lockery, S. R. Active currents regulate sensitivity



- and dynamic range in *C. elegans* Neurons. *Neuron* **20**, 763–772 (1998).
38. Goodman, M. B., Lindsay, T. H., Lockery, S. R. & Richmond, J. E. Electrophysiological Methods for *C. elegans* Neurobiology. *Methods Cell Biol.* **107**, 409 (2012).
39. Xie, L. *et al.* NLF-1 Delivers a Sodium Leak Channel to Regulate Neuronal Excitability and Modulate Rhythmic Locomotion. *Neuron* **77**, 1069–1082 (2013).
40. Mellem, J., Brockie, P., Madsen, D. & Maricq, A. Action potentials contribute to neuronal signaling in *C. elegans*. *Nat. Neurosci.* (2008).
41. Liu, P., Chen, B. & Wang, Z.-W. SLO-2 potassium channel is an important regulator of neurotransmitter release in *Caenorhabditis elegans*. *Nat. Commun.* **2014 51** **5**, 1–12 (2014).
42. Huang, Y. C. *et al.* Gain-of-function mutations in the UNC-2/CaV2 $\alpha$  channel lead to excitation-dominant synaptic transmission in *C. elegans*. *Elife* **8**, (2019).
43. Saheki, Y. & Bargmann, C. I. Presynaptic CaV2 calcium channel traffic requires CALF-1 and the  $\alpha(2)\delta$  subunit UNC-36. *Nat. Neurosci.* **12**, 1257–1265 (2009).
44. Richmond, J. E. & Jorgensen, E. M. One GABA and two acetylcholine receptors function at the *C. elegans* neuromuscular junction. *Nat. Neurosci.* **2**, 791–798 (1999).
45. Oh, K. H., Krout, M. D., Richmond, J. E. & Kim, H. UNC-2 CaV2 Channel Localization at Presynaptic Active Zones Depends on UNC-10/RIM and SYD-2/Liprin- $\alpha$  in *Caenorhabditis elegans*. *J. Neurosci.* **41**, 4782–4794 (2021).
46. Lesage, F. TWIK-1, a ubiquitous human weakly inward rectifying K<sup>+</sup> channel with a novel structure. *EMBO J.* **15**, 1004–1011 (1996).
47. Cluzeaud, F. *et al.* Expression of TWIK-1, a novel weakly inward rectifying potassium channel in rat kidney. *Am. J. Physiol. - Cell Physiol.* **275**, (1998).
48. Chavez, R., Gray, A., Zhao, B. & Kindler, C. TWIK-2, a new weak inward rectifying member of the tandem pore domain potassium channel family. *J. Biol.* (1999).
49. Ben Soussia, I. *et al.* Mutation of a single residue promotes gating of vertebrate and invertebrate two-pore domain potassium channels. *Nat. Commun.* **10**, 1–13 (2019).
50. Aryal, P., Abd-Wahab, F., Bucci, G. & Sansom, M. A hydrophobic barrier deep within the inner pore of the TWIK-1 K2P potassium channel. *Nature* (2014).
51. Armenti, S. T., Lohmer, L. L., Sherwood, D. R. & Nance, J. Repurposing an endogenous degradation system for rapid and targeted depletion of *C. elegans* proteins. *Dev.* **141**, 4640–4647 (2014).
52. Zheng, Y., Brockie, P. J., Mellem, J. E., Madsen, D. M. & Maricq, A. V. Neuronal control of locomotion in *C. elegans* is modified by a dominant mutation in the GLR-1 ionotropic glutamate receptor. *Neuron* **24**, 347–361 (1999).
53. Pirri, J. K., McPherson, A. D., Donnelly, J. L., Francis, M. M. & Alkema, M. J. A Tyramine-Gated Chloride Channel Coordinates Distinct Motor Programs of a *Caenorhabditis elegans* Escape Response. *Neuron* **62**, 526–538 (2009).
54. Ji, N. *et al.* Corollary discharge promotes a sustained motor state in a neural circuit for navigation. *Elife* **10**, (2021).
55. Gordus, A., Pokala, N., Levy, S., Flavell, S. W. & Bargmann, C. I. Feedback from network states generates variability in a probabilistic olfactory circuit. *Cell* **161**, 215–227 (2015).
56. Wagh, D. A. *et al.* Bruchpilot, a protein with homology to ELKS/CAST, is required for structural integrity and function of synaptic active zones in *Drosophila*. *Neuron* **49**, 833–

1280 844 (2006).

1281 57. Sordillo, A. & Bargmann, C. I. Behavioral control by depolarized and hyperpolarized states  
1282 of an integrating neuron. *Elife* **10**, (2021).

1283 58. Chitturi, J. *et al.* The UBR-1 ubiquitin ligase regulates glutamate metabolism to generate  
1284 coordinated motor pattern in *Caenorhabditis elegans*. *PLOS Genet.* **14**, e1007303 (2018).

1285 59. Fouad, A. D. *et al.* Distributed rhythm generators underlie *Caenorhabditis elegans*  
1286 forward locomotion. *Elife* **7**, (2018).

1287 60. Kato, S. *et al.* Global Brain Dynamics Embed the Motor Command Sequence of  
1288 *Caenorhabditis elegans*. *Cell* **163**, 656–669 (2015).

1289 61. Kindt, K. S. *et al.* Dopamine Mediates Context-Dependent Modulation of Sensory  
1290 Plasticity in *C. elegans*. *Neuron* **55**, 662–676 (2007).

1291 62. Nguyen, J. P. *et al.* Whole-brain calcium imaging with cellular resolution in freely  
1292 behaving *Caenorhabditis elegans*. *Proc. Natl. Acad. Sci.* **113**, E1074–E1081 (2016).

1293 63. N, J. *et al.* Corollary discharge promotes a sustained motor state in a neural circuit for  
1294 navigation. *Elife* **10**, (2021).

1295 64. Ben Arous, J., Tanizawa, Y., Rabinowitch, I., Chatenay, D. & Schafer, W. R. Automated  
1296 imaging of neuronal activity in freely behaving *Caenorhabditis elegans*. *J. Neurosci.*  
1297 *Methods* **187**, 229–234 (2010).

1298 65. Venkatachalam, V. *et al.* Pan-neuronal imaging in roaming *Caenorhabditis elegans*. *Proc.*  
1299 *Natl. Acad. Sci. U. S. A.* **113**, E1082–E1088 (2016).

1300 66. Liu, P., Chen, B., Mailler, R. & Wang, Z. W. Antidromic-rectifying gap junctions amplify  
1301 chemical transmission at functionally mixed electrical-chemical synapses. *Nat. Commun.*  
1302 **8**, 1–16 (2017).

1303 67. Starich, T. A., Xu, J., Skerrett, I. M., Nicholson, B. J. & Shaw, J. E. Interactions between  
1304 innexins UNC-7 and UNC-9 mediate electrical synapse specificity in the *Caenorhabditis*  
1305 *elegans* locomotory nervous system. *Neural Dev.* **2009 41 4**, 1–28 (2009).

1306 68. Bhardwaj, A., Thapliyal, S., Dahiya, Y. & Babu, K. FLP-18 functions through the G-protein-  
1307 coupled receptors NPR-1 and NPR-4 to modulate reversal length in *Caenorhabditis*  
1308 *elegans*. *J. Neurosci.* **38**, 4641–4654 (2018).

1309 69. Taylor, S. R. *et al.* Molecular topography of an entire nervous system. *Cell* **184**, 4329-  
1310 4347.e23 (2021).

1311 70. Hammarlund, M., Hobert, O., Miller, D. M. & Sestan, N. The CeNGEN Project: The  
1312 Complete Gene Expression Map of an Entire Nervous System. *Neuron* **99**, 430–433  
1313 (2018).

1314 71. Hoogstraaten, R. I., van Keimpema, L., Toonen, R. F. & Verhage, M. Tetanus insensitive  
1315 VAMP2 differentially restores synaptic and dense core vesicle fusion in tetanus  
1316 neurotoxin treated neurons. *Sci. Rep.* **10**, (2020).

1317 72. Schiavo, G. G. *et al.* Tetanus and botulinum-B neurotoxins block neurotransmitter release  
1318 by proteolytic cleavage of synaptobrevin. *Nat.* **1992 3596398 359**, 832–835 (1992).

1319 73. Lim, M. A. *et al.* Neuroendocrine modulation sustains the *C. elegans* forward motor state.  
1320 *Elife* **5**, (2016).

1321 74. Hammell, C. M. & Hannon, G. J. Inducing RNAi in *Caenorhabditis elegans* by Injection of  
1322 dsRNA. *Cold Spring Harb. Protoc.* **2016**, 80–85 (2016).

1323 75. Ghezzi, A., Liebeskind, B. J., Thompson, A., Atkinson, N. S. & Zakon, H. H. Ancient

- association between cation leak channels and Mid1 proteins is conserved in fungi and animals. *Front. Mol. Neurosci.* **7**, (2014).
76. Zhao, B., Khare, P., Feldman, L. & Dent, J. A. Reversal Frequency in *Caenorhabditis elegans* Represents an Integrated Response to the State of the Animal and Its Environment. *J. Neurosci.* **23**, 5319 (2003).
77. Pierce-Shimomura, J. T., Morse, T. M. & Lockery, S. R. The Fundamental Role of Pirouettes in *Caenorhabditis elegans* Chemotaxis. *J. Neurosci.* **19**, 9557 (1999).
78. Gray, J. M., Hill, J. J. & Bargmann, C. I. A circuit for navigation in *Caenorhabditis elegans*. *Proc. Natl. Acad. Sci. U. S. A.* **102**, 3184–3191 (2005).
79. CROLL, N. A. Components and patterns in the behaviour of the nematode *Caenorhabditis elegans*. *J. Zool.* **176**, 159–176 (2009).
80. Chen, L. *et al.* Escape steering by cholecystokinin peptidergic signaling. *Cell Rep.* **38**, (2022).
81. Huang, K. M., Cosman, P. & Schafer, W. R. Machine vision based detection of omega bends and reversals in *C. elegans*. *J. Neurosci. Methods* **158**, 323–336 (2006).
82. Wang, Y. *et al.* Flexible motor sequence generation during stereotyped escape responses. *Elife* **9**, 1–27 (2020).
83. Mohammadi, A., Byrne Rodgers, J., Kotera, I. & Ryu, W. S. Behavioral response of *Caenorhabditis elegans* to localized thermal stimuli. *BMC Neurosci.* **14**, (2013).
84. Cook, S. J. *et al.* Whole-animal connectomes of both *Caenorhabditis elegans* sexes. *Nature* **571**, 63–71 (2019).
85. Witvliet, D. *et al.* Connectomes across development reveal principles of brain maturation. *Nature* **596**, 257–261 (2021).
86. Lu, Y. *et al.* Extrasynaptic signaling enables an asymmetric juvenile motor circuit to produce symmetric undulation. *Curr. Biol.* **32**, 4631–4644.e5 (2022).
87. Kaplan, H. S., Salazar Thula, O., Khoss, N. & Zimmer Correspondence, M. Nested Neuronal Dynamics Orchestrate a Behavioral Hierarchy across Timescales. *Neuron* **105**, 562–576.e9 (2020).
88. Randi, F., Sharma, A. K., Dvali, S. & Leifer, A. M. A functional connectivity atlas of *C. elegans* measured by neural activation. (2022). doi:10.48550/arxiv.2208.04790
89. Ashaber, M. *et al.* Anatomy and activity patterns in a multifunctional motor neuron and its surrounding circuits. *Elife* **10**, 1–30 (2021).
90. Takahashi, N., Sasaki, T., Matsumoto, W., Matsuki, N. & Ikegaya, Y. Circuit topology for synchronizing neurons in spontaneously active networks. *Proc. Natl. Acad. Sci. U. S. A.* **107**, 10244–10249 (2010).
91. Wang, Z. *et al.* The relationship of anatomical and functional connectivity to resting state connectivity in primate somatosensory cortex. *Neuron* **78**, 1116 (2013).
92. Zarin, A. A., Mark, B., Cardona, A., Litwin-Kumar, A. & Doe, C. Q. A multilayer circuit architecture for the generation of distinct locomotor behaviors in *Drosophila*. *Elife* **8**, (2019).
93. Liu, Q., Kidd, P. B., Dobosiewicz, M. & Bargmann, C. I. *C. elegans* AWA Olfactory Neurons Fire Calcium-Mediated All-or-None Action Potentials. *Cell* **175**, 57–70.e17 (2018).
94. Jiang, J. *et al.* *C. elegans* enteric motor neurons fire synchronized action potentials

- underlying the defecation motor program. *Nat. Commun.* 2022 131 **13**, 1–15 (2022).
95. Liu, Q., Hollopeter, G. & Jorgensen, E. M. Graded synaptic transmission at the Caenorhabditis elegans neuromuscular junction. *Proc. Natl. Acad. Sci. U. S. A.* **106**, 10823–10828 (2009).
96. Geffeney, S. L. *et al.* DEG/ENaC but not TRP channels are the major mechanoelectrical transduction channels in a C. elegans nociceptor. *Neuron* **71**, 845 (2011).
97. Lindsay, T. H., Thiele, T. R. & Lockery, S. R. Optogenetic analysis of synaptic transmission in the central nervous system of the nematode Caenorhabditis elegans. *Nat. Commun.* **2**, 306 (2011).
98. O'Hagan, R., Chalfie, M. & Goodman, M. B. The MEC-4 DEG/ENaC channel of Caenorhabditis elegans touch receptor neurons transduces mechanical signals. *Nat. Neurosci.* **8**, 43–50 (2005).
99. Ramot, D., MacInnis, B. L. & Goodman, M. B. Bidirectional temperature-sensing by a single thermosensory neuron in C. elegans. *Nat. Neurosci.* **11**, 908–915 (2008).
100. Salkoff, L., Wei, A., Baban, B., Butler, A. & Fawcett, G. Potassium channels in C. elegans. (2005).
101. El Mouridi, S. *et al.* Reliable CRISPR/Cas9 genome engineering in Caenorhabditis elegans using a single efficient sgRNA and an easily recognizable phenotype. *G3 Genes, Genomes, Genet.* **7**, 1429–1437 (2017).
102. Genome sequence of the nematode C. elegans: a platform for investigating biology. *Science* **282**, 2012–2018 (1998).
103. Salkoff, L. *et al.* Evolution tunes the excitability of individual neurons. *Neuroscience* **103**, 853–859 (2001).
104. Zhou, C. *et al.* Differential modulation of C. elegans motor behavior by NALCN and two-pore domain potassium channels. *PLoS Genet.* **18**, (2022).
105. Goodman, M. B. & Sengupta, P. The extraordinary AFD thermosensor of C. elegans. *Pflugers Arch.* **470**, 839 (2018).
106. Nicoletti, M. *et al.* Biophysical modeling of C. Elegans neurons: Single ion currents and whole-cell dynamics of AWCon and RMD. *PLoS One* **14**, e0218738 (2019).
107. Shindou, T. *et al.* Active propagation of dendritic electrical signals in C. elegans. *Sci. Reports* 2019 91 **9**, 1–12 (2019).
108. Dobosiewicz, M., Liu, Q. & Bargmann, C. I. Reliability of an interneuron response depends on an integrated sensory state. *Elife* **8**, (2019).
109. Faumont, S., Lindsay, T. & Lockery, S. Neuronal microcircuits for decision making in C. elegans. *Curr. Opin. Neurobiol.* **22**, 580–591 (2012).
110. Richmond, J. E., Davis, W. S. & Jorgensen, E. M. Unc-13 is required for synaptic vesicle fusion in C. elegans. *Nat. Neurosci.* **2**, 959–964 (1999).
111. Brockie, P. J., Mellem, J. E., Hills, T., Madsen, D. M. & Maricq, A. V. The C. elegans Glutamate Receptor Subunit NMR-1 Is Required for Slow NMDA-Activated Currents that Regulate Reversal Frequency during Locomotion. *Neuron* **31**, 617–630 (2001).
112. Qi, Y., Garren, E. & Shu, X. Photo-inducible cell ablation in Caenorhabditis elegans using the genetically encoded singlet oxygen generating protein miniSOG. *Proc.* (2012).
113. Lu, Y. *et al.* Extrasynaptic signaling enables an asymmetric juvenile motor circuit to produce symmetric undulation. *Curr. Biol.* **0**, (2022).

- 1412 114. Meng, J. *et al.* Myrf ER-bound transcription factors drive C. elegans synaptic plasticity via  
1413 cleavage-dependent nuclear translocation. *Dev. Cell* **41**, 180 (2017).
- 1414 115. Yeh, E., Kawano, T., Weimer, R. M., Bessereau, J. L. & Zhen, M. Identification of Genes  
1415 Involved in Synaptogenesis Using a Fluorescent Active Zone Marker in Caenorhabditis  
1416 elegans. *J. Neurosci.* **25**, 3833 (2005)
- 1417
